# Supplementary material
Source: PubMed Central journal article supplement (PMC5712275)

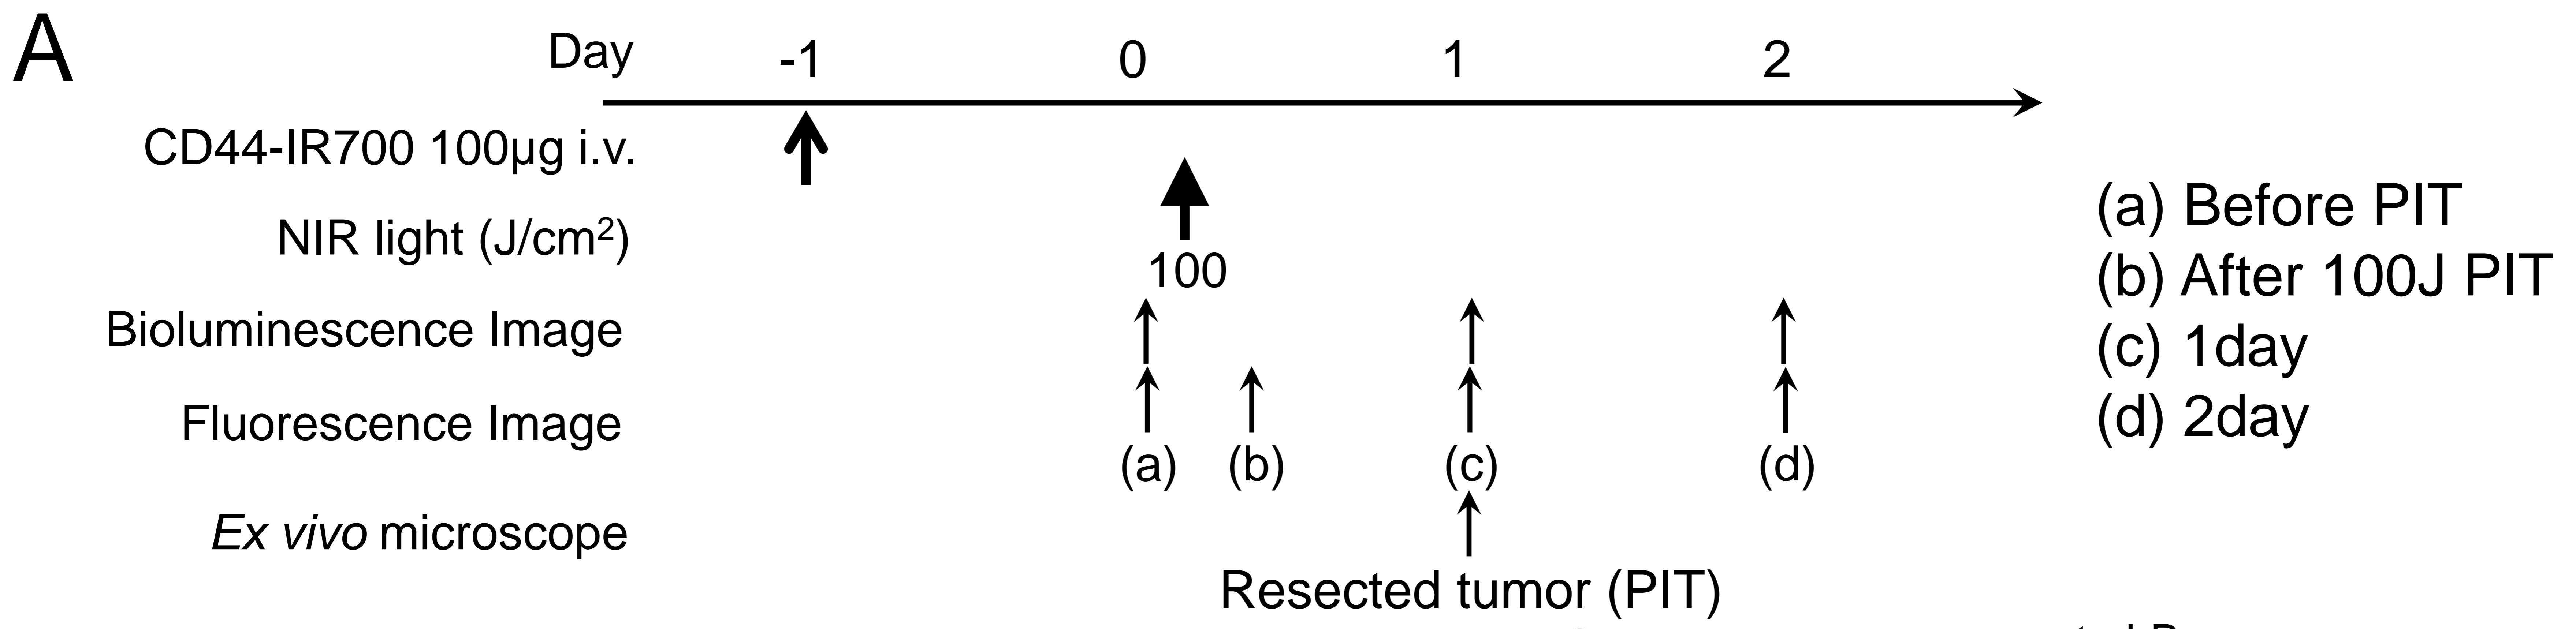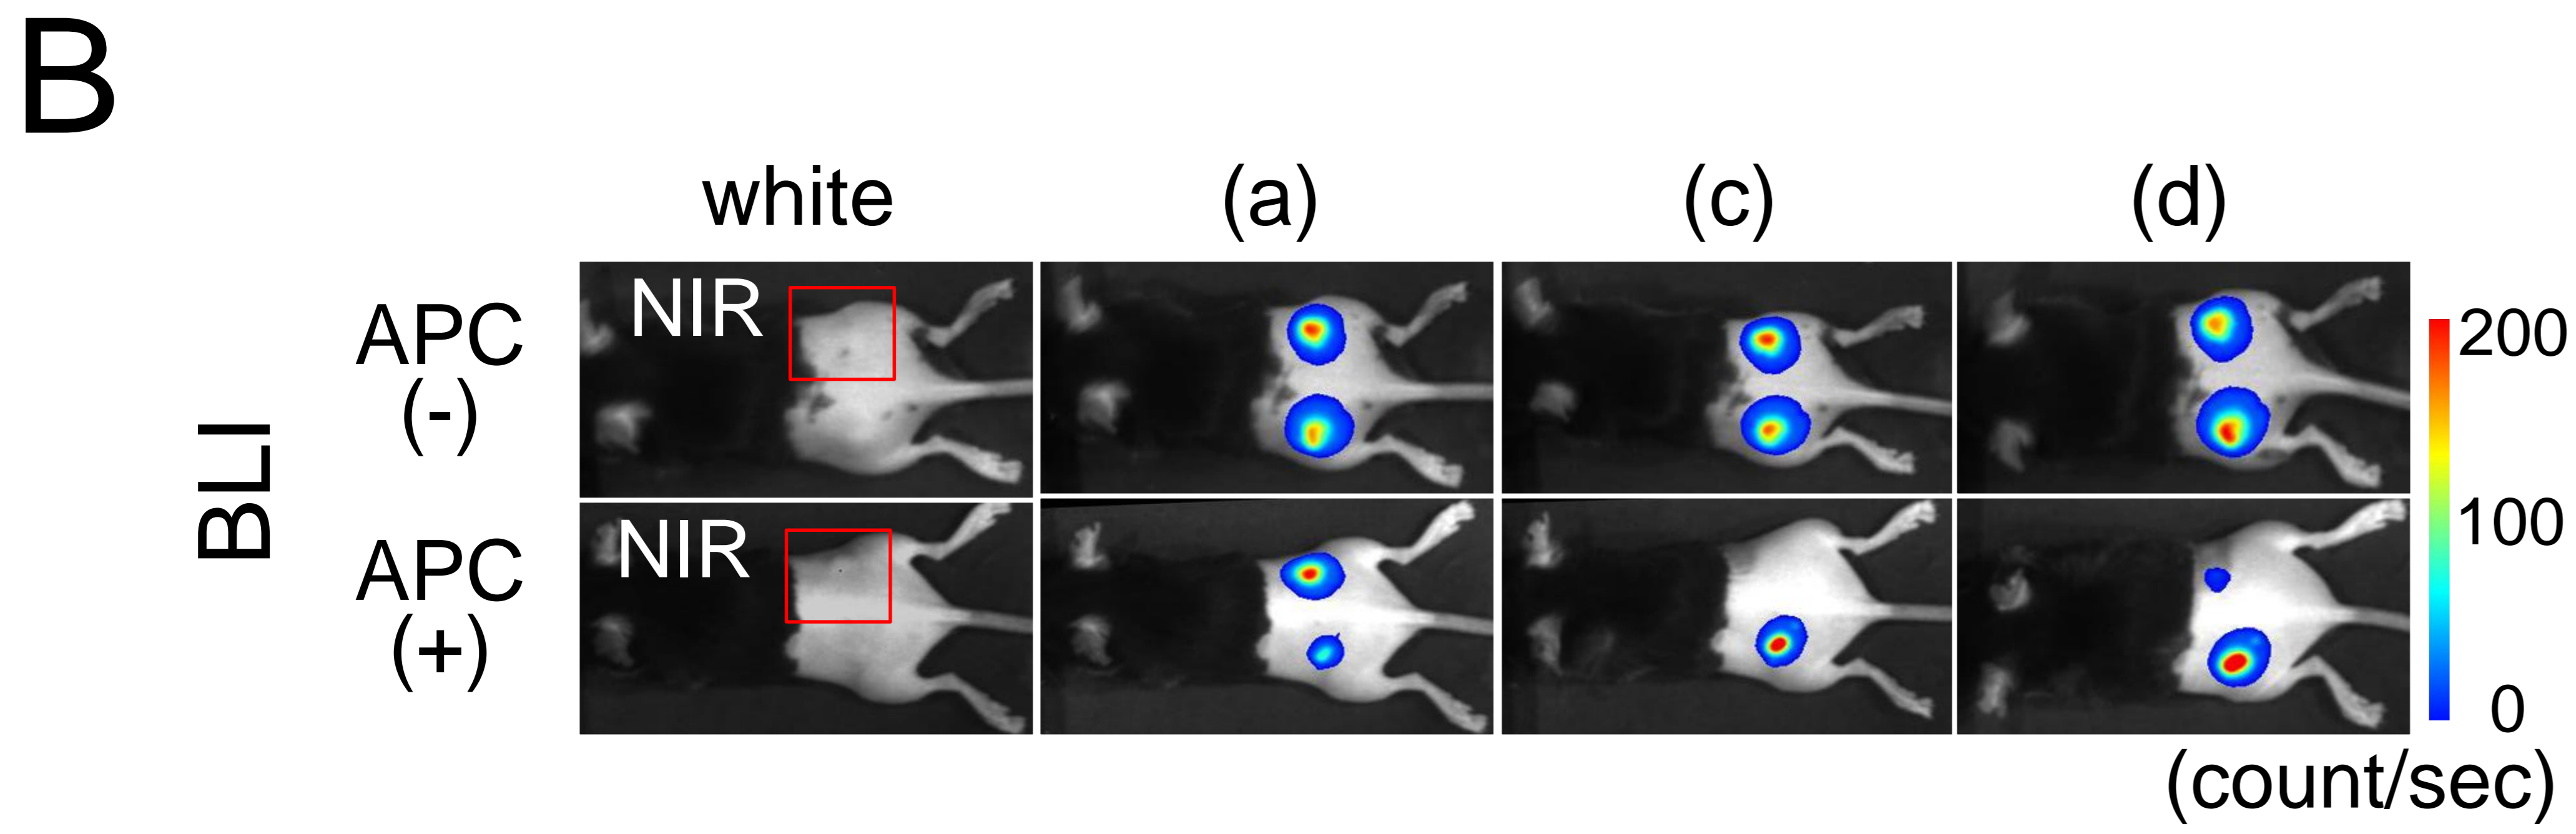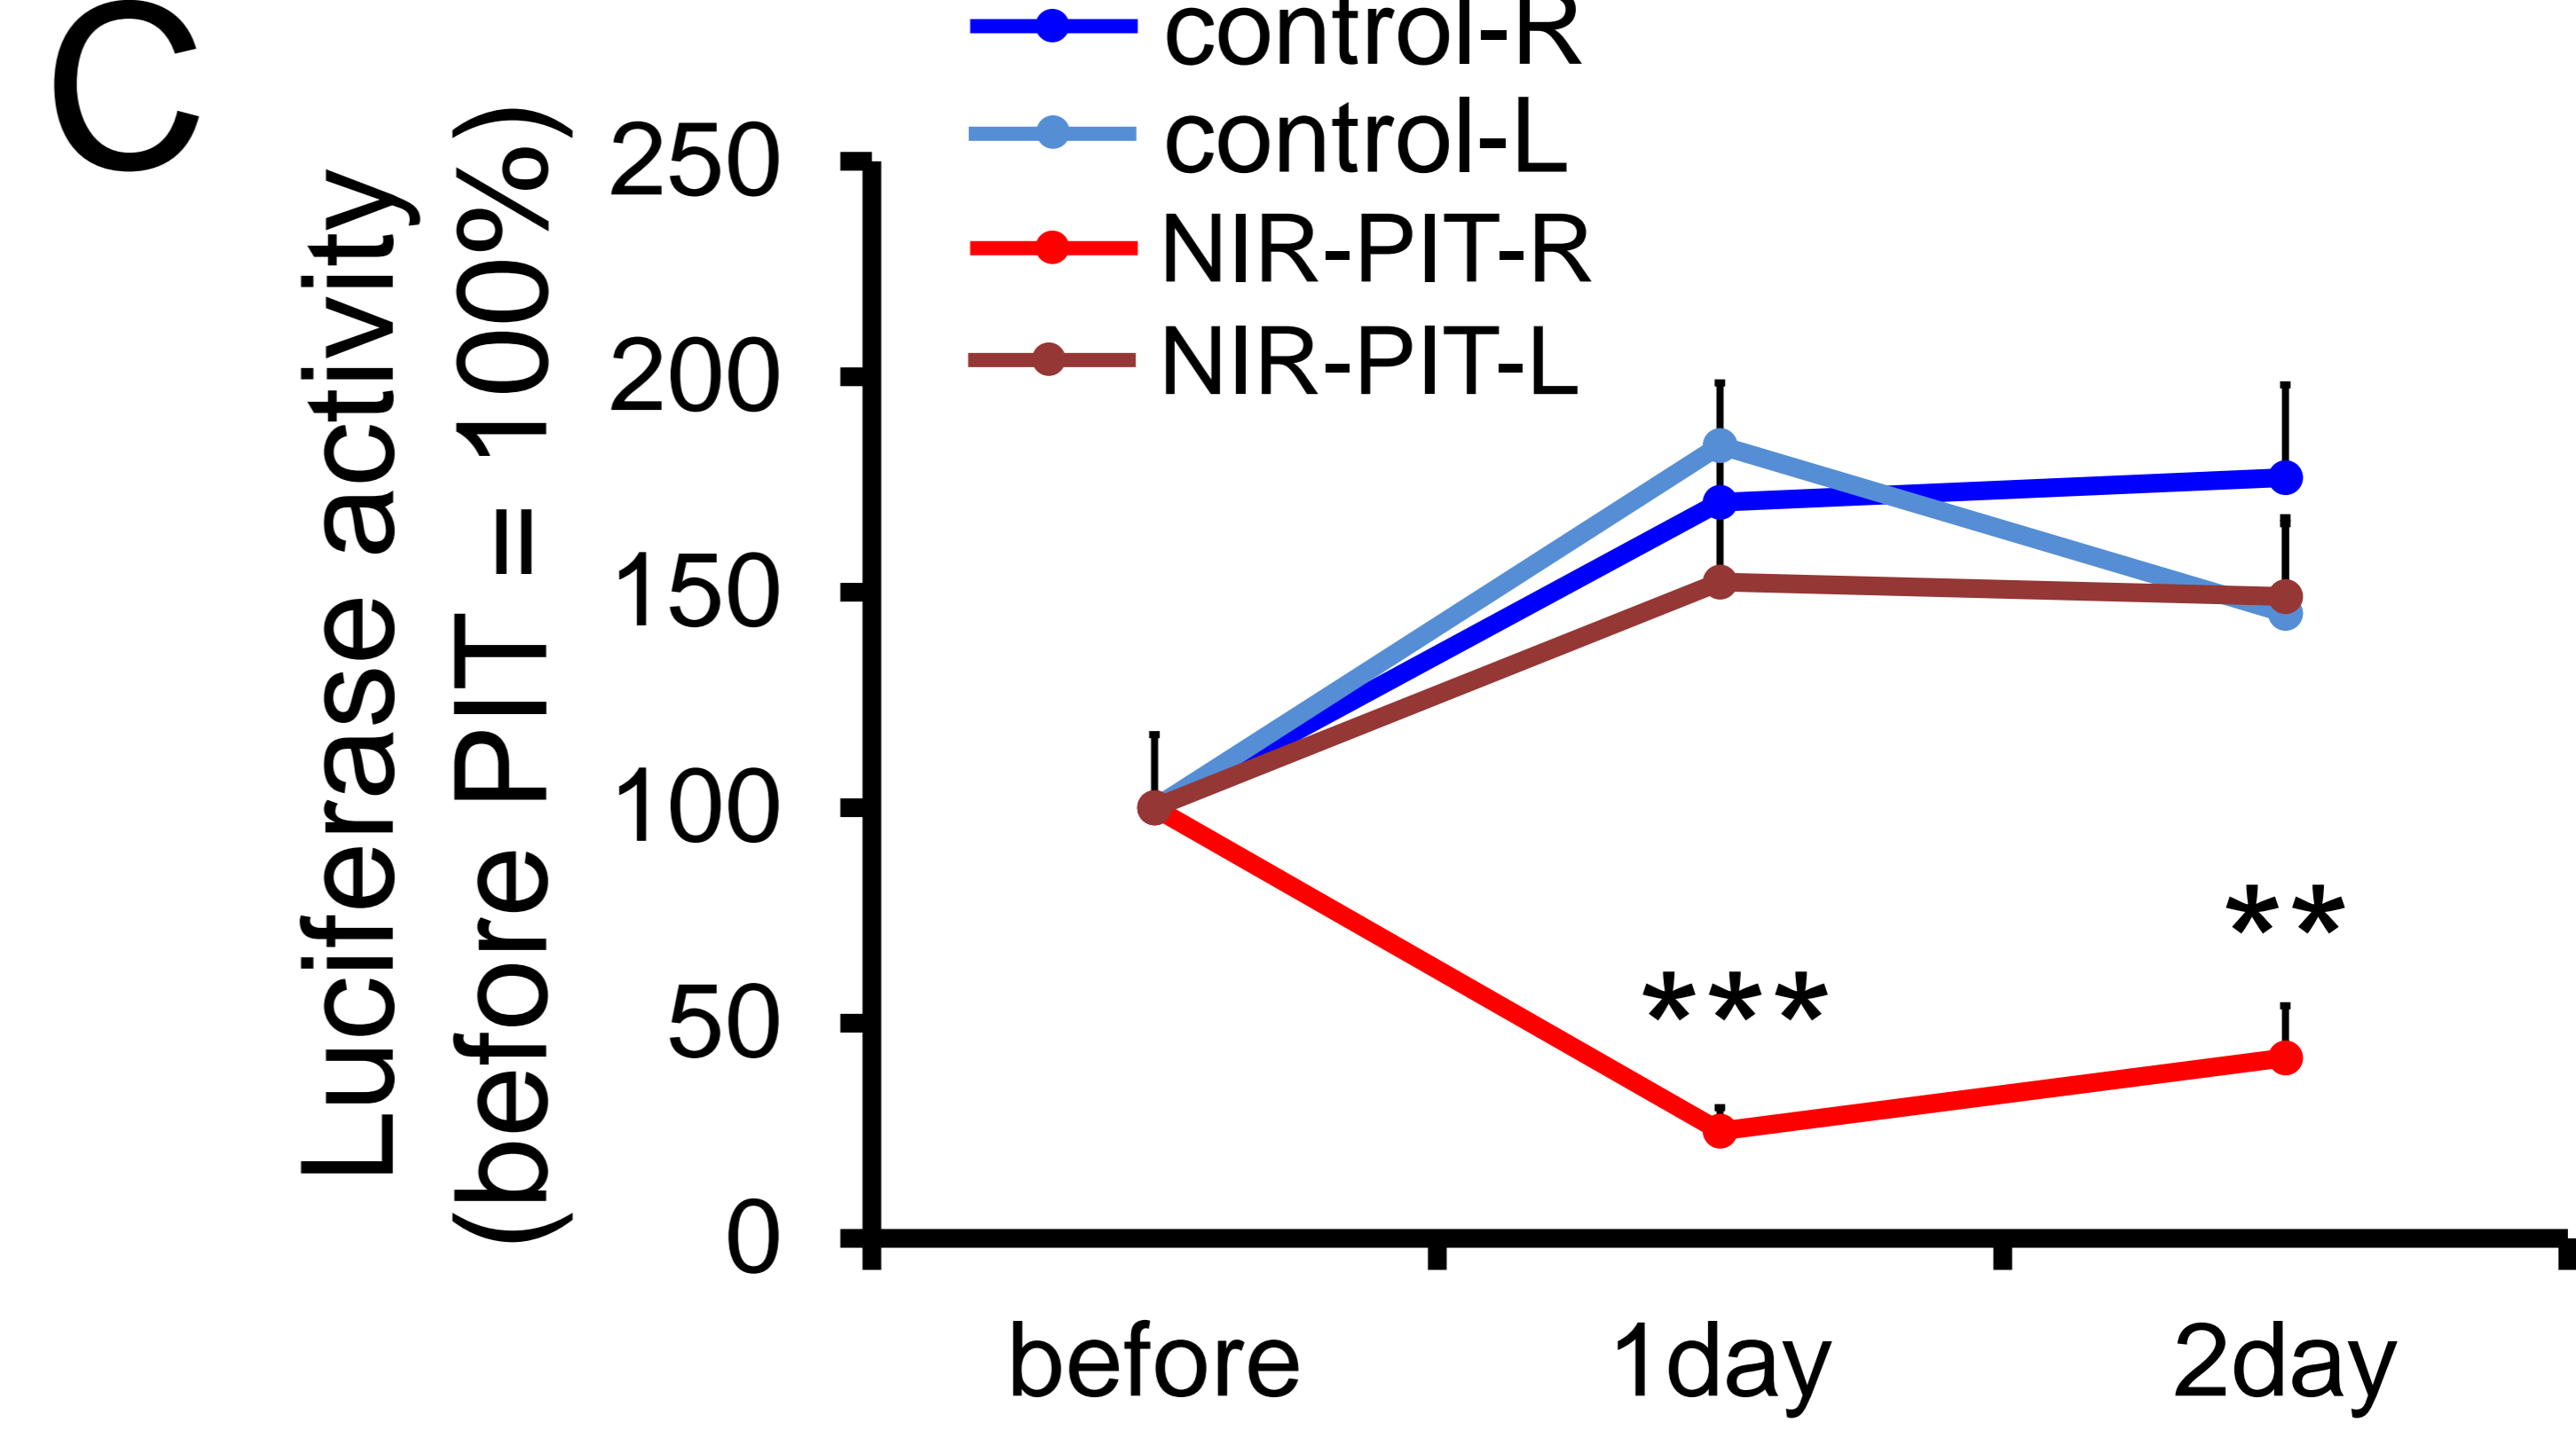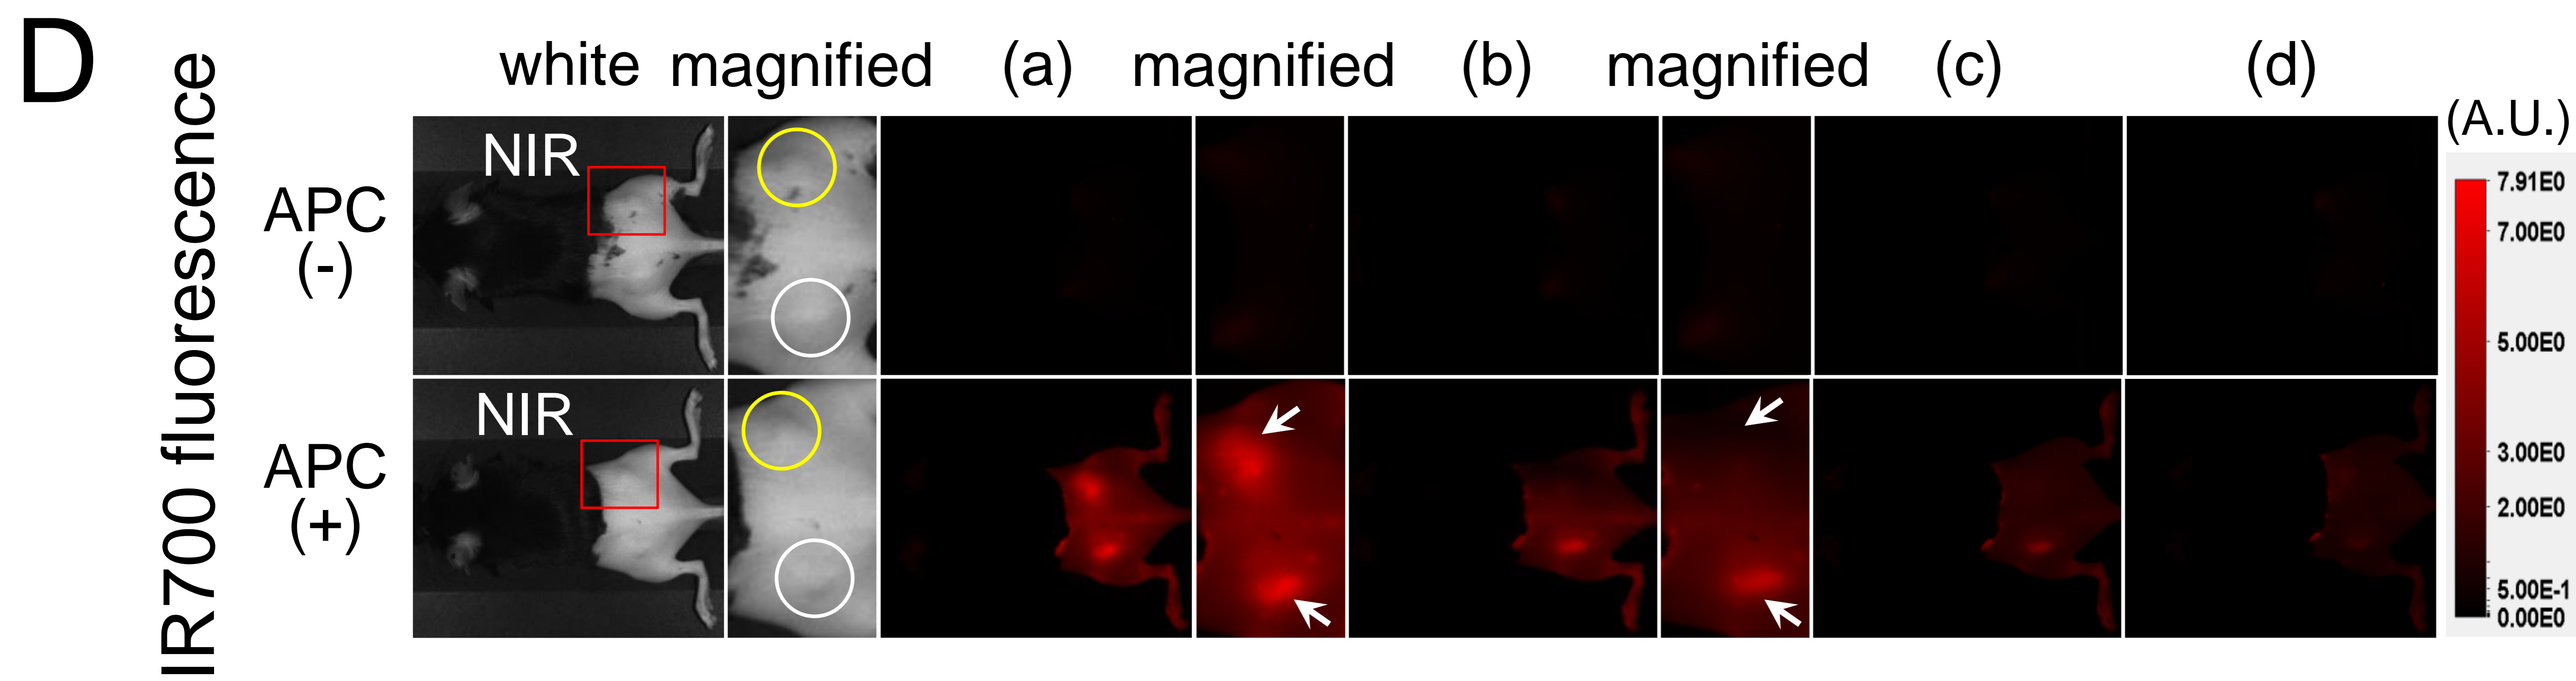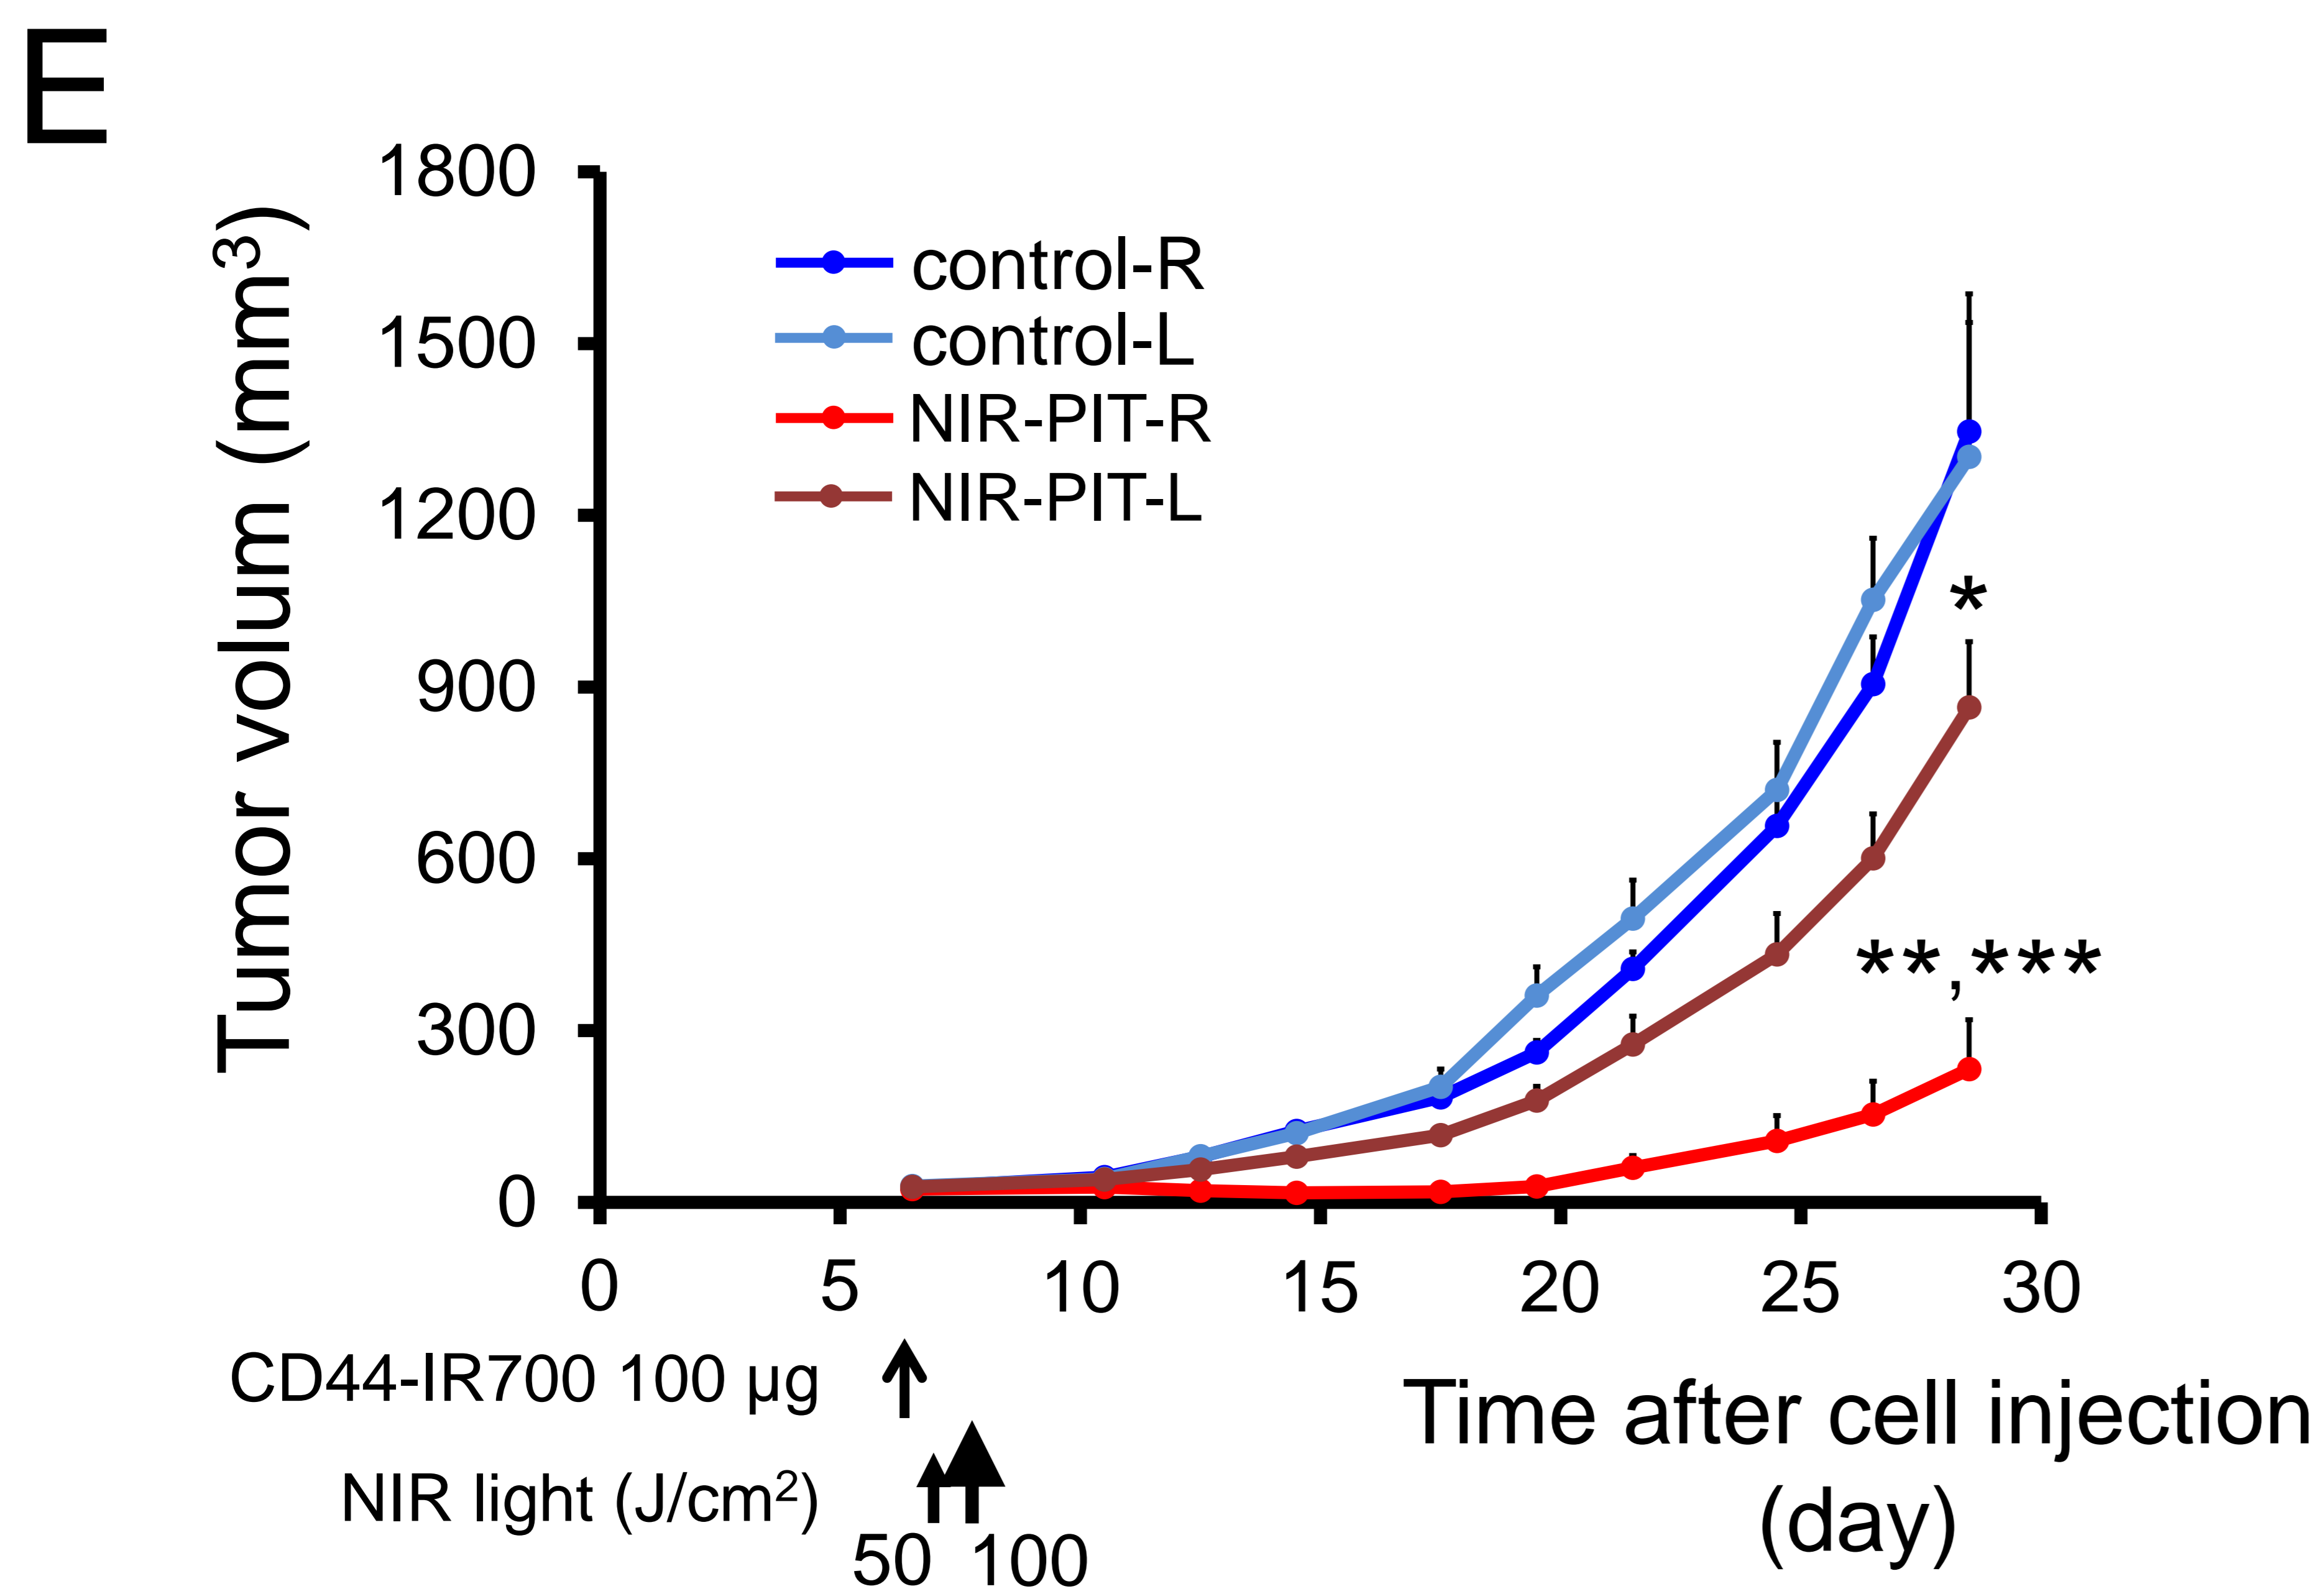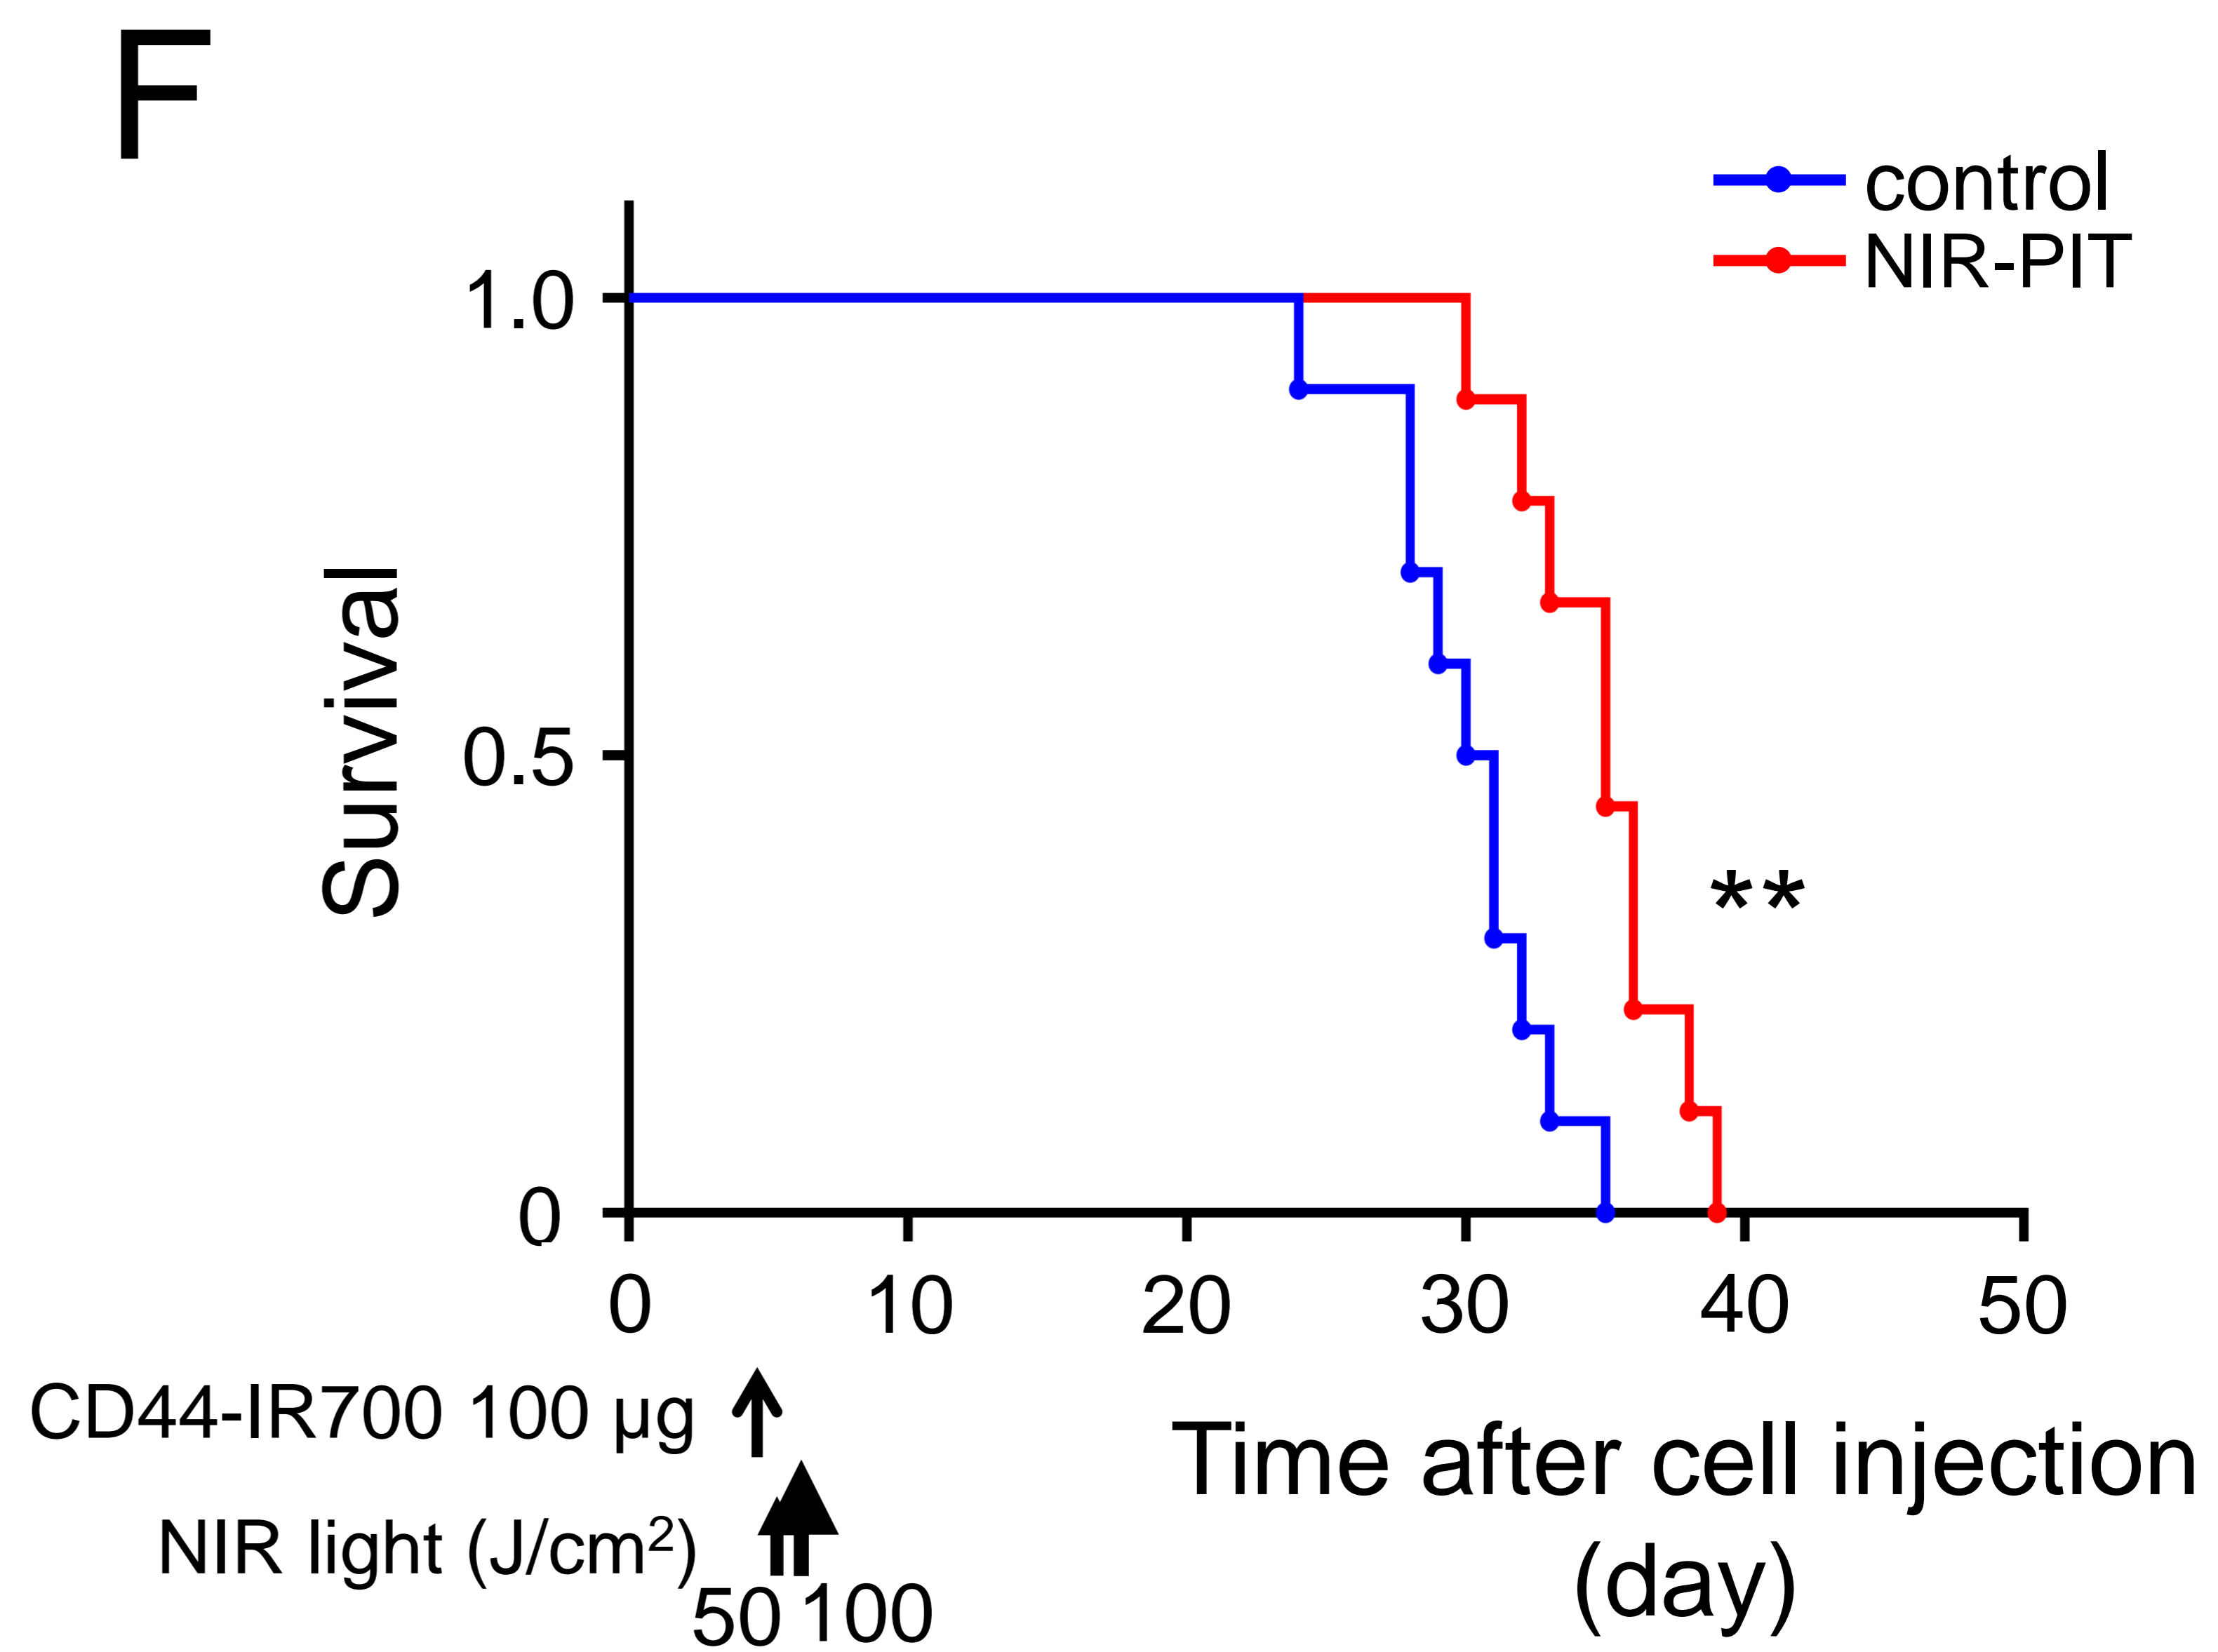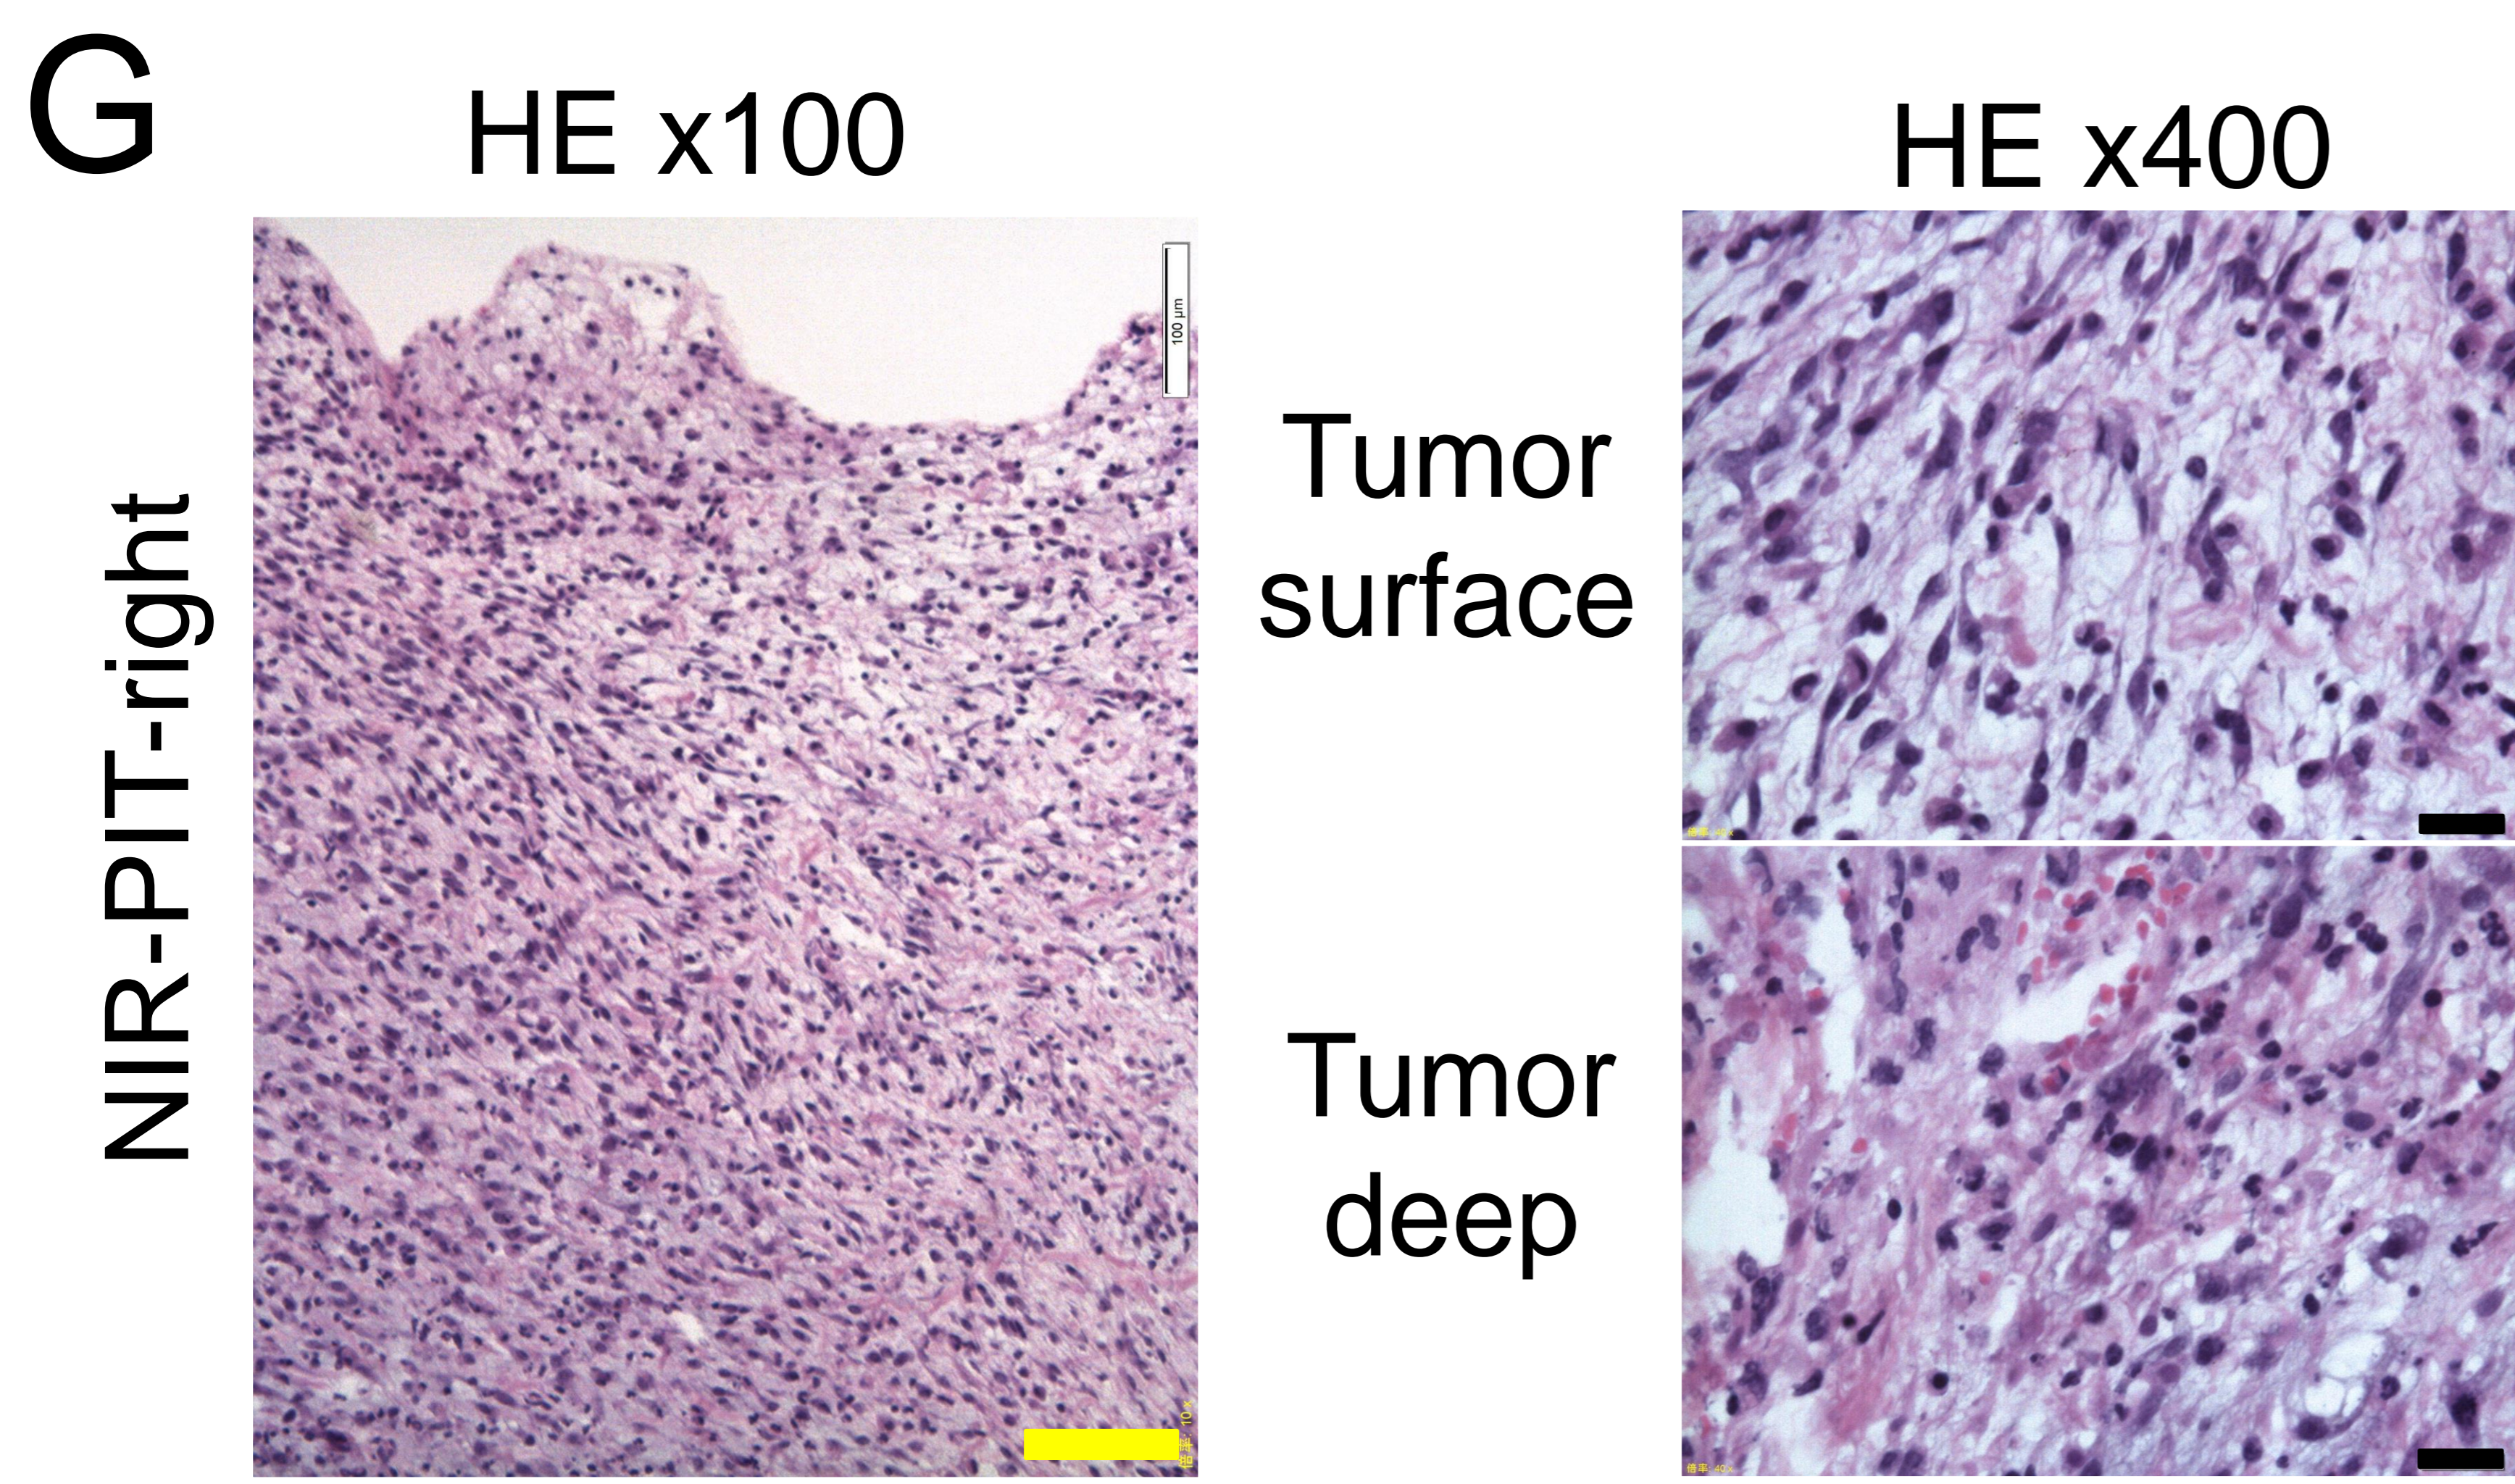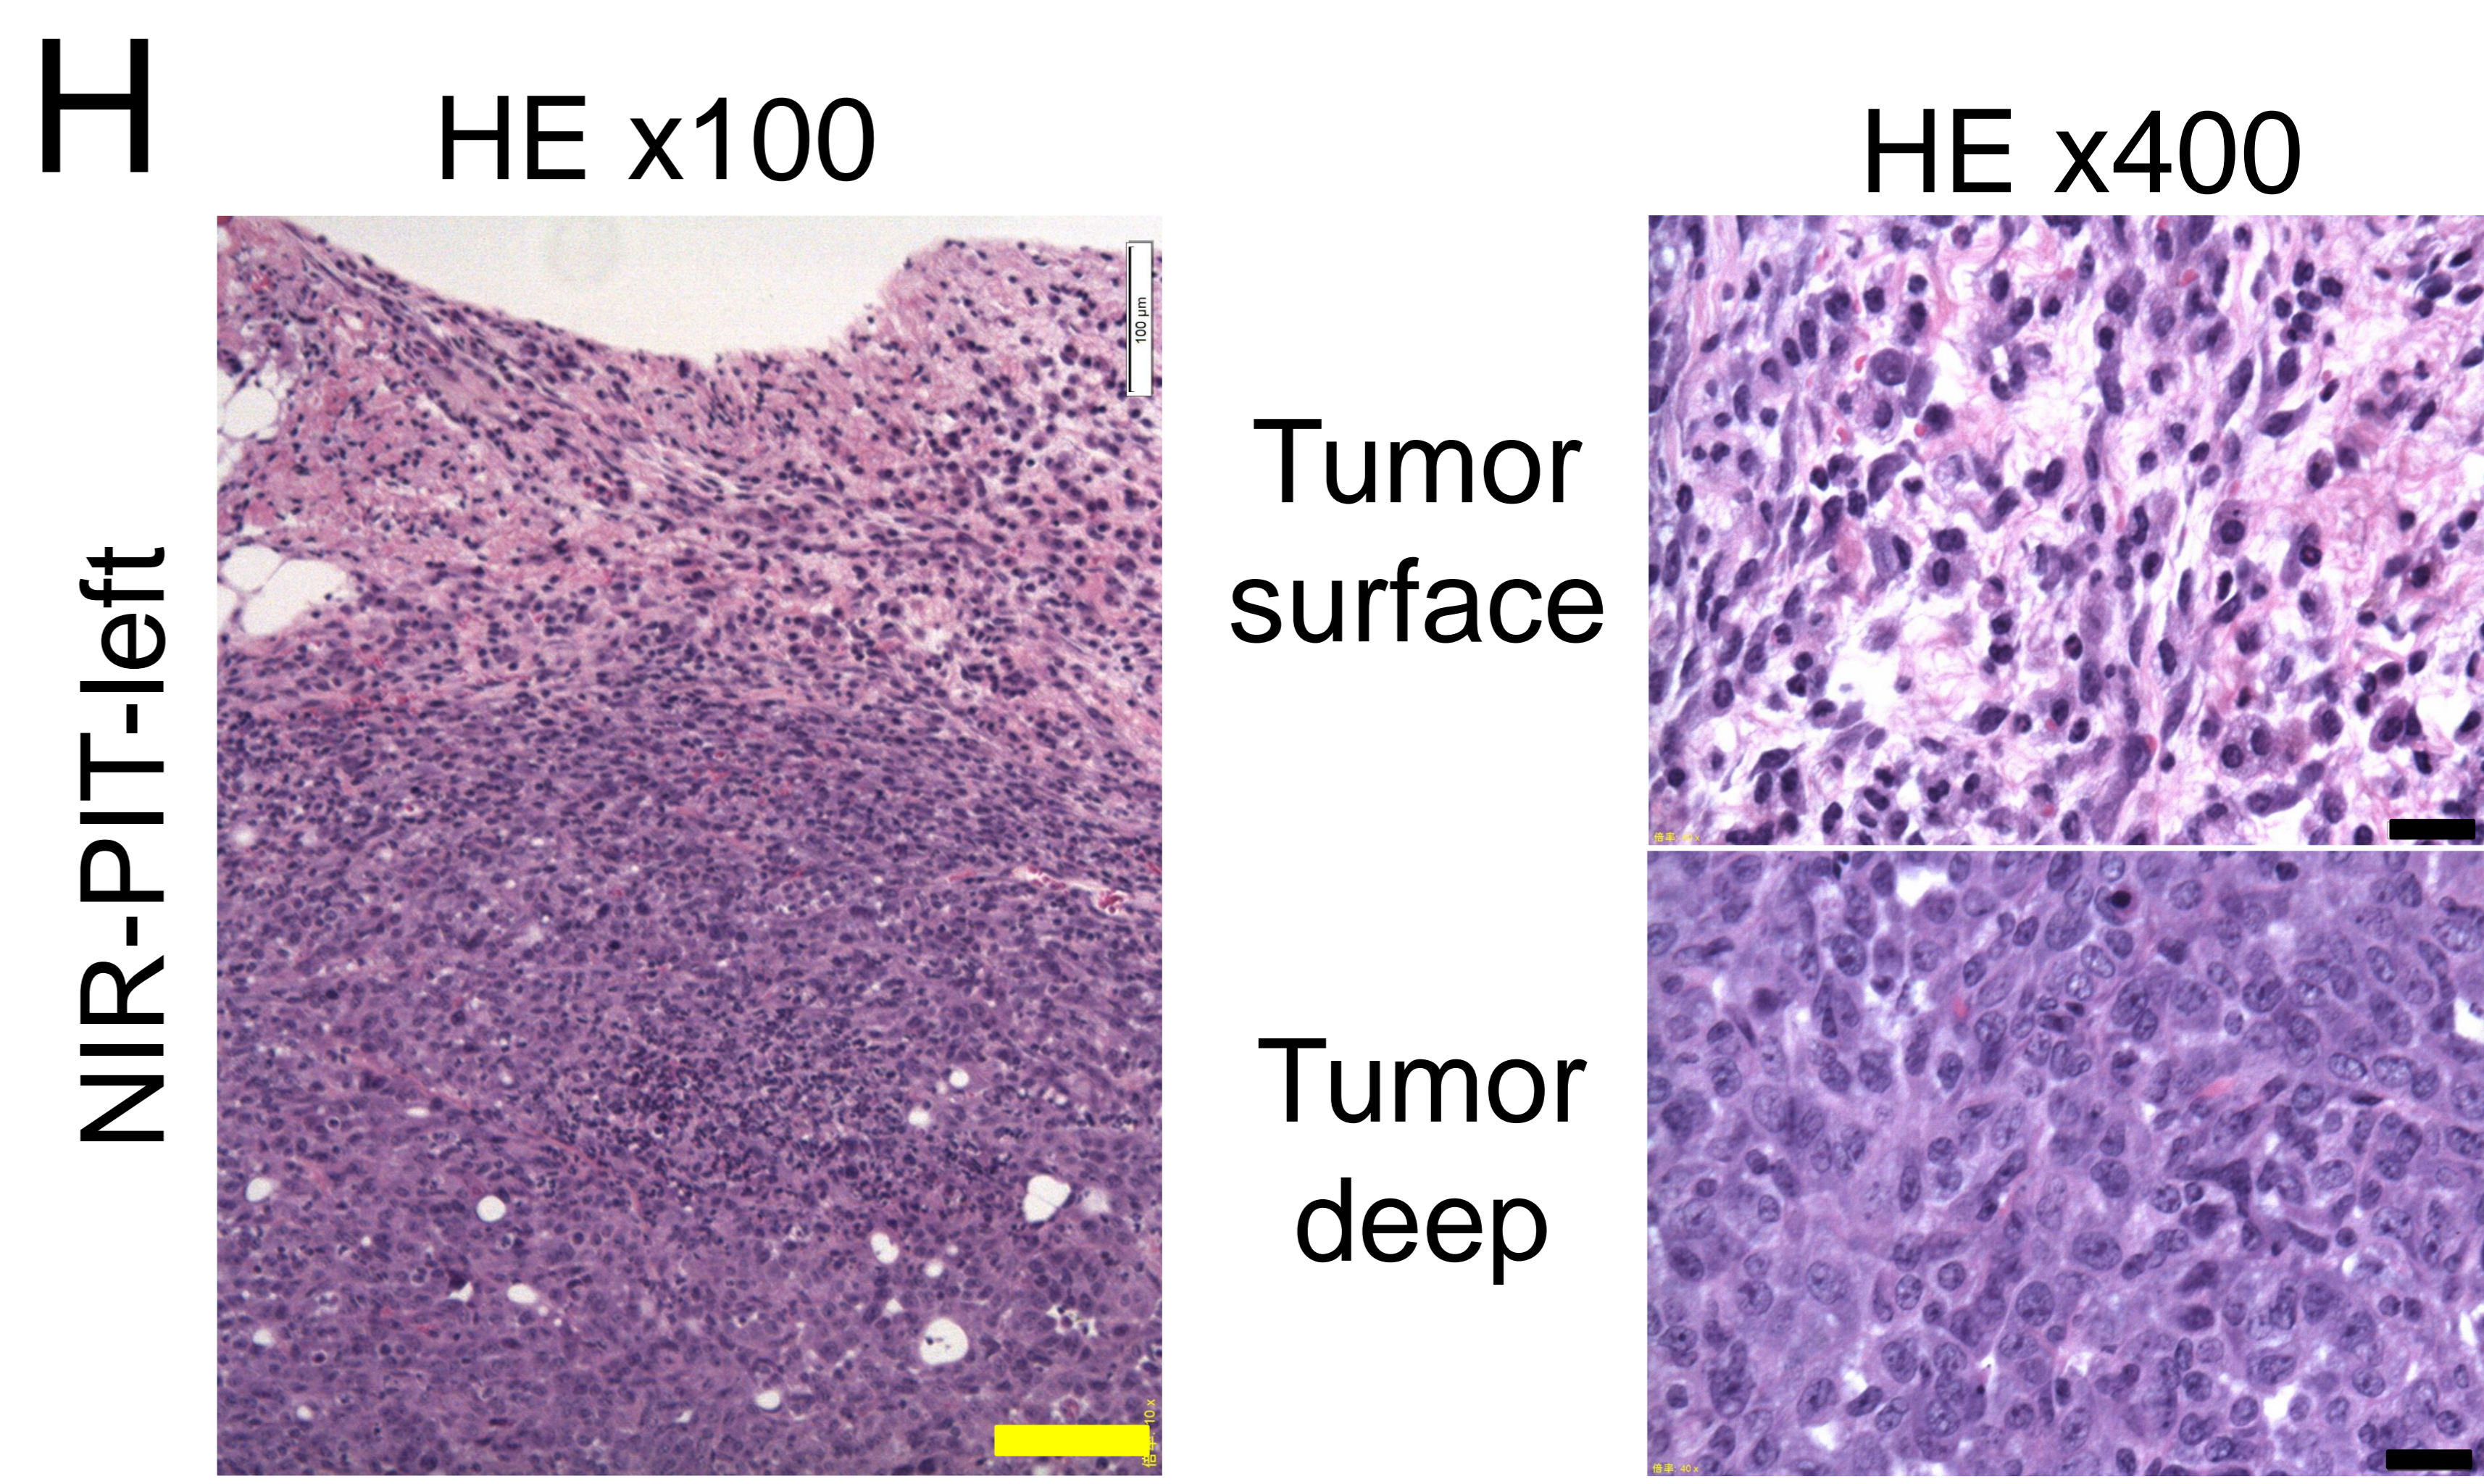



**A**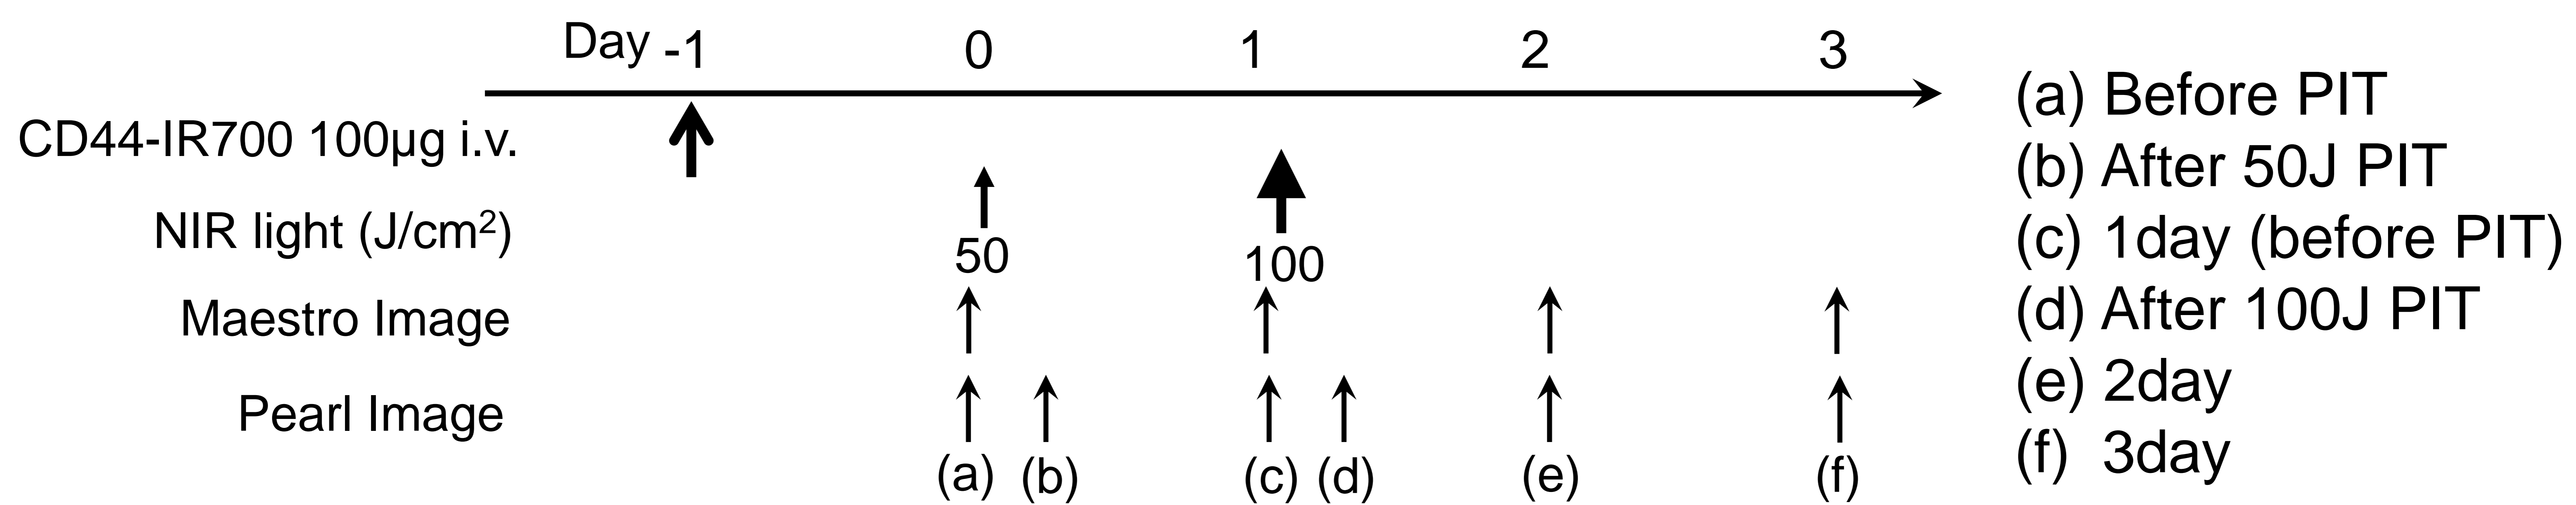**B**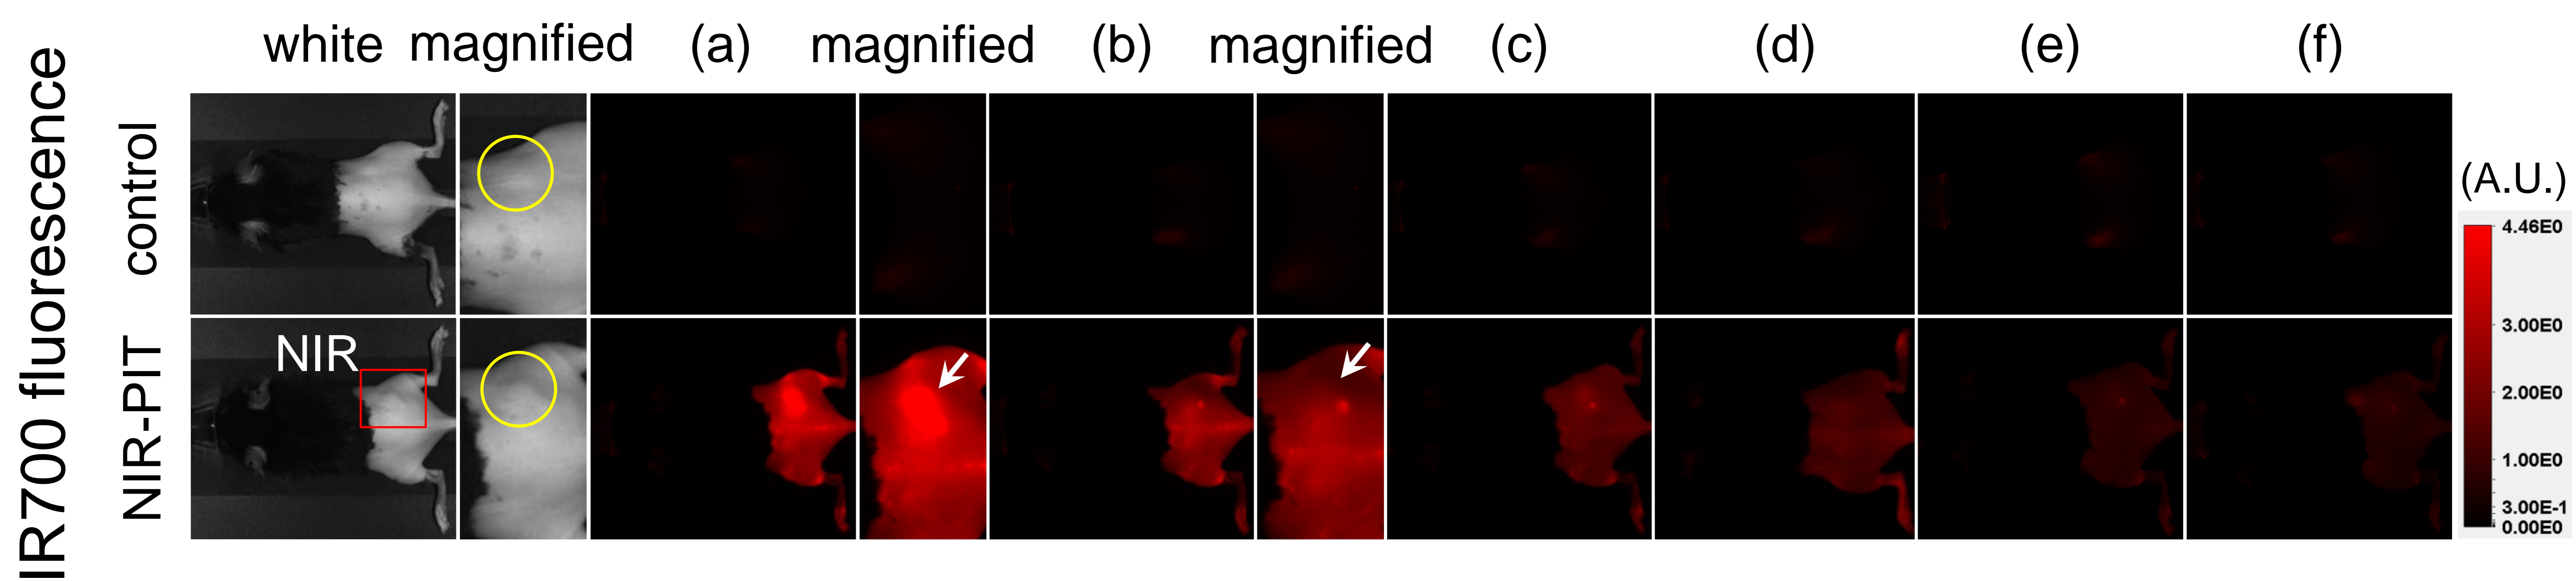**C**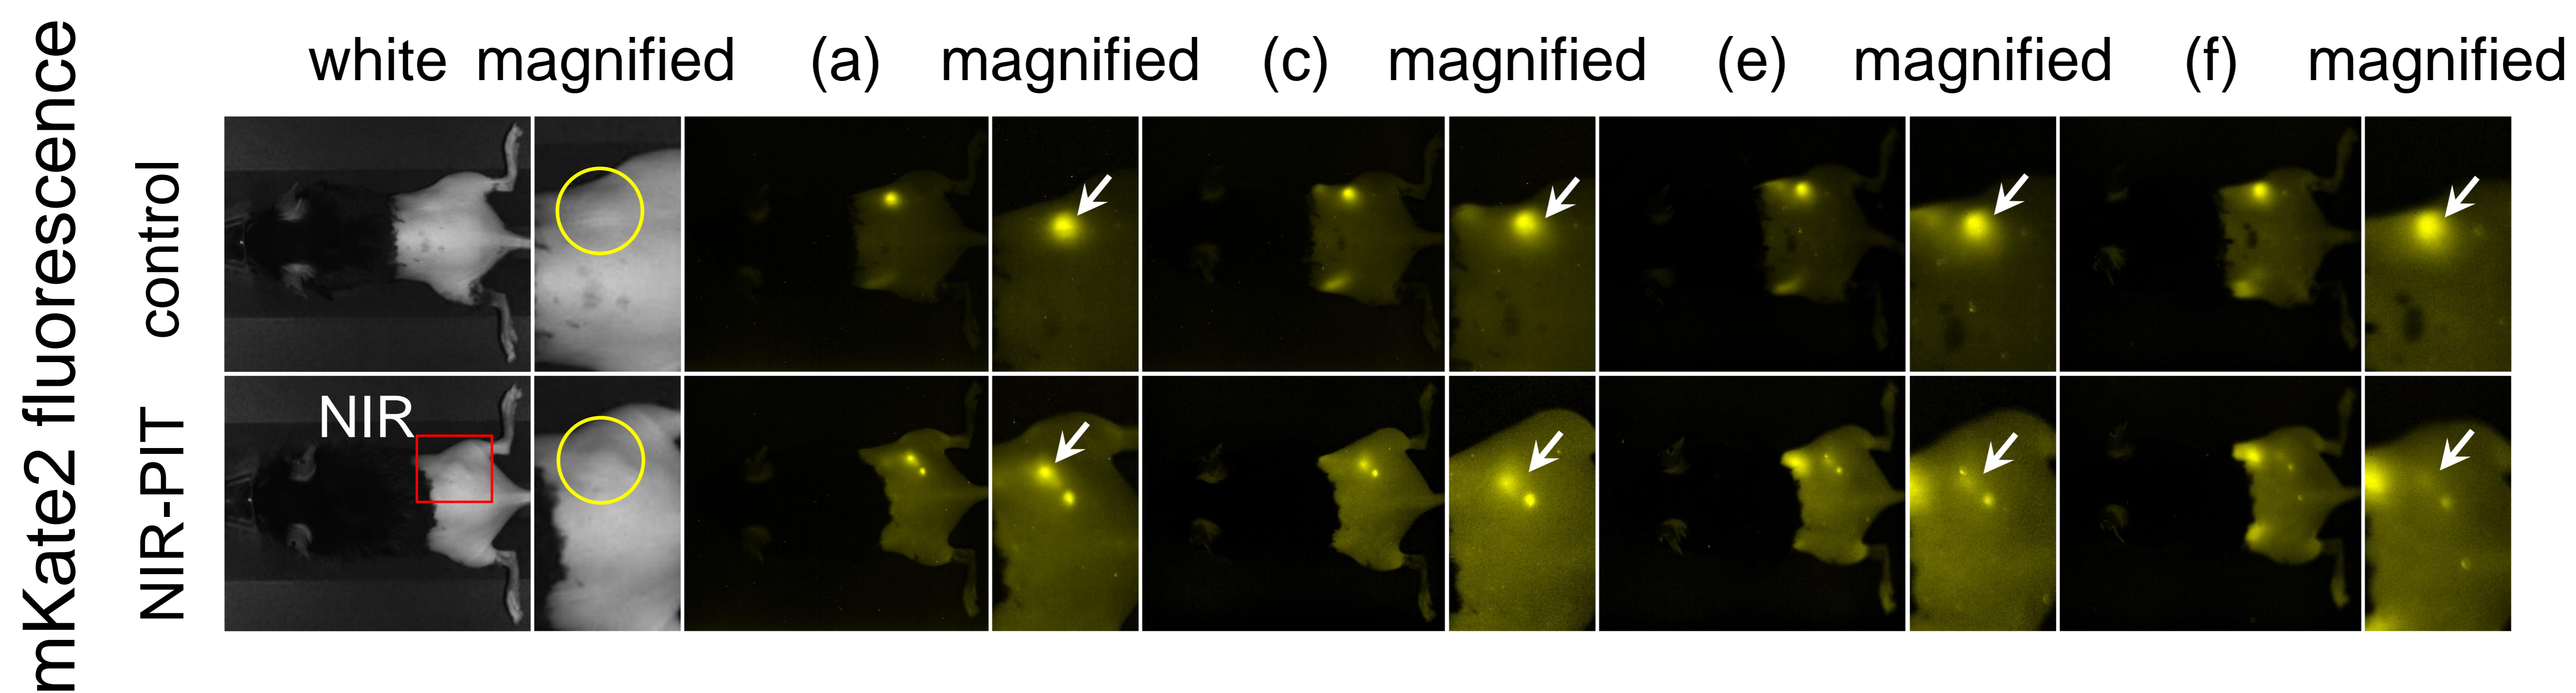**D**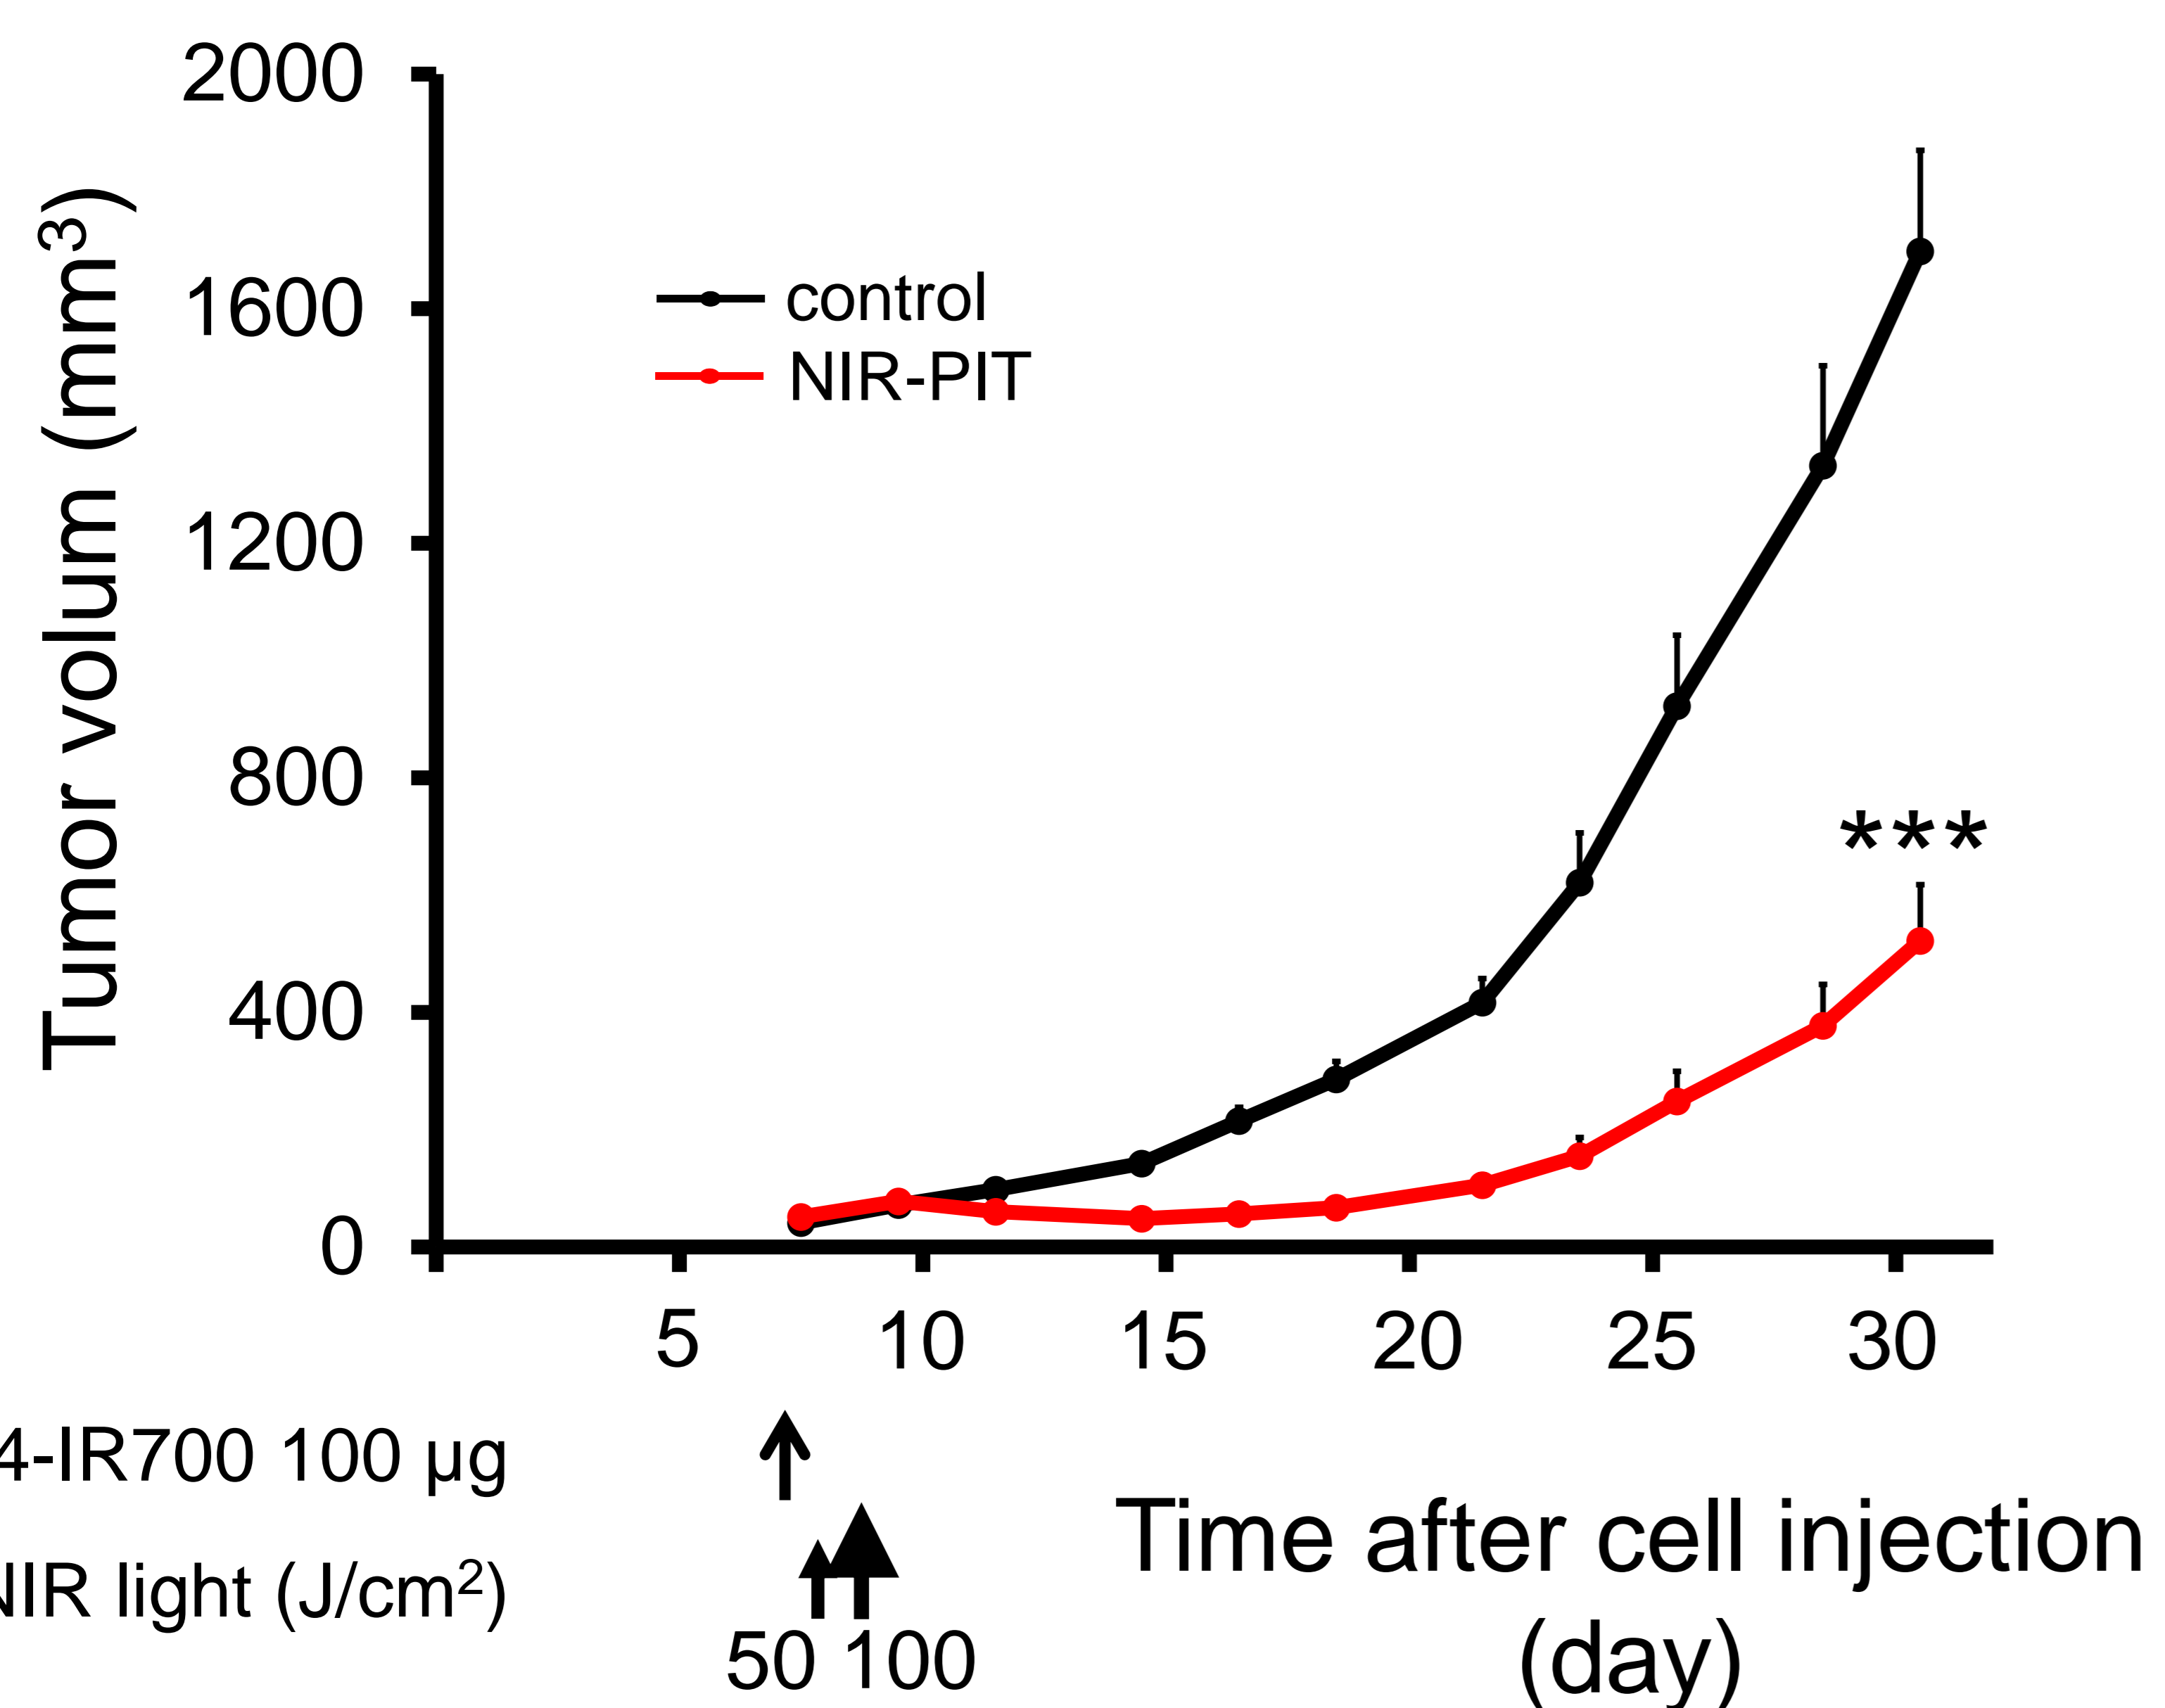**E**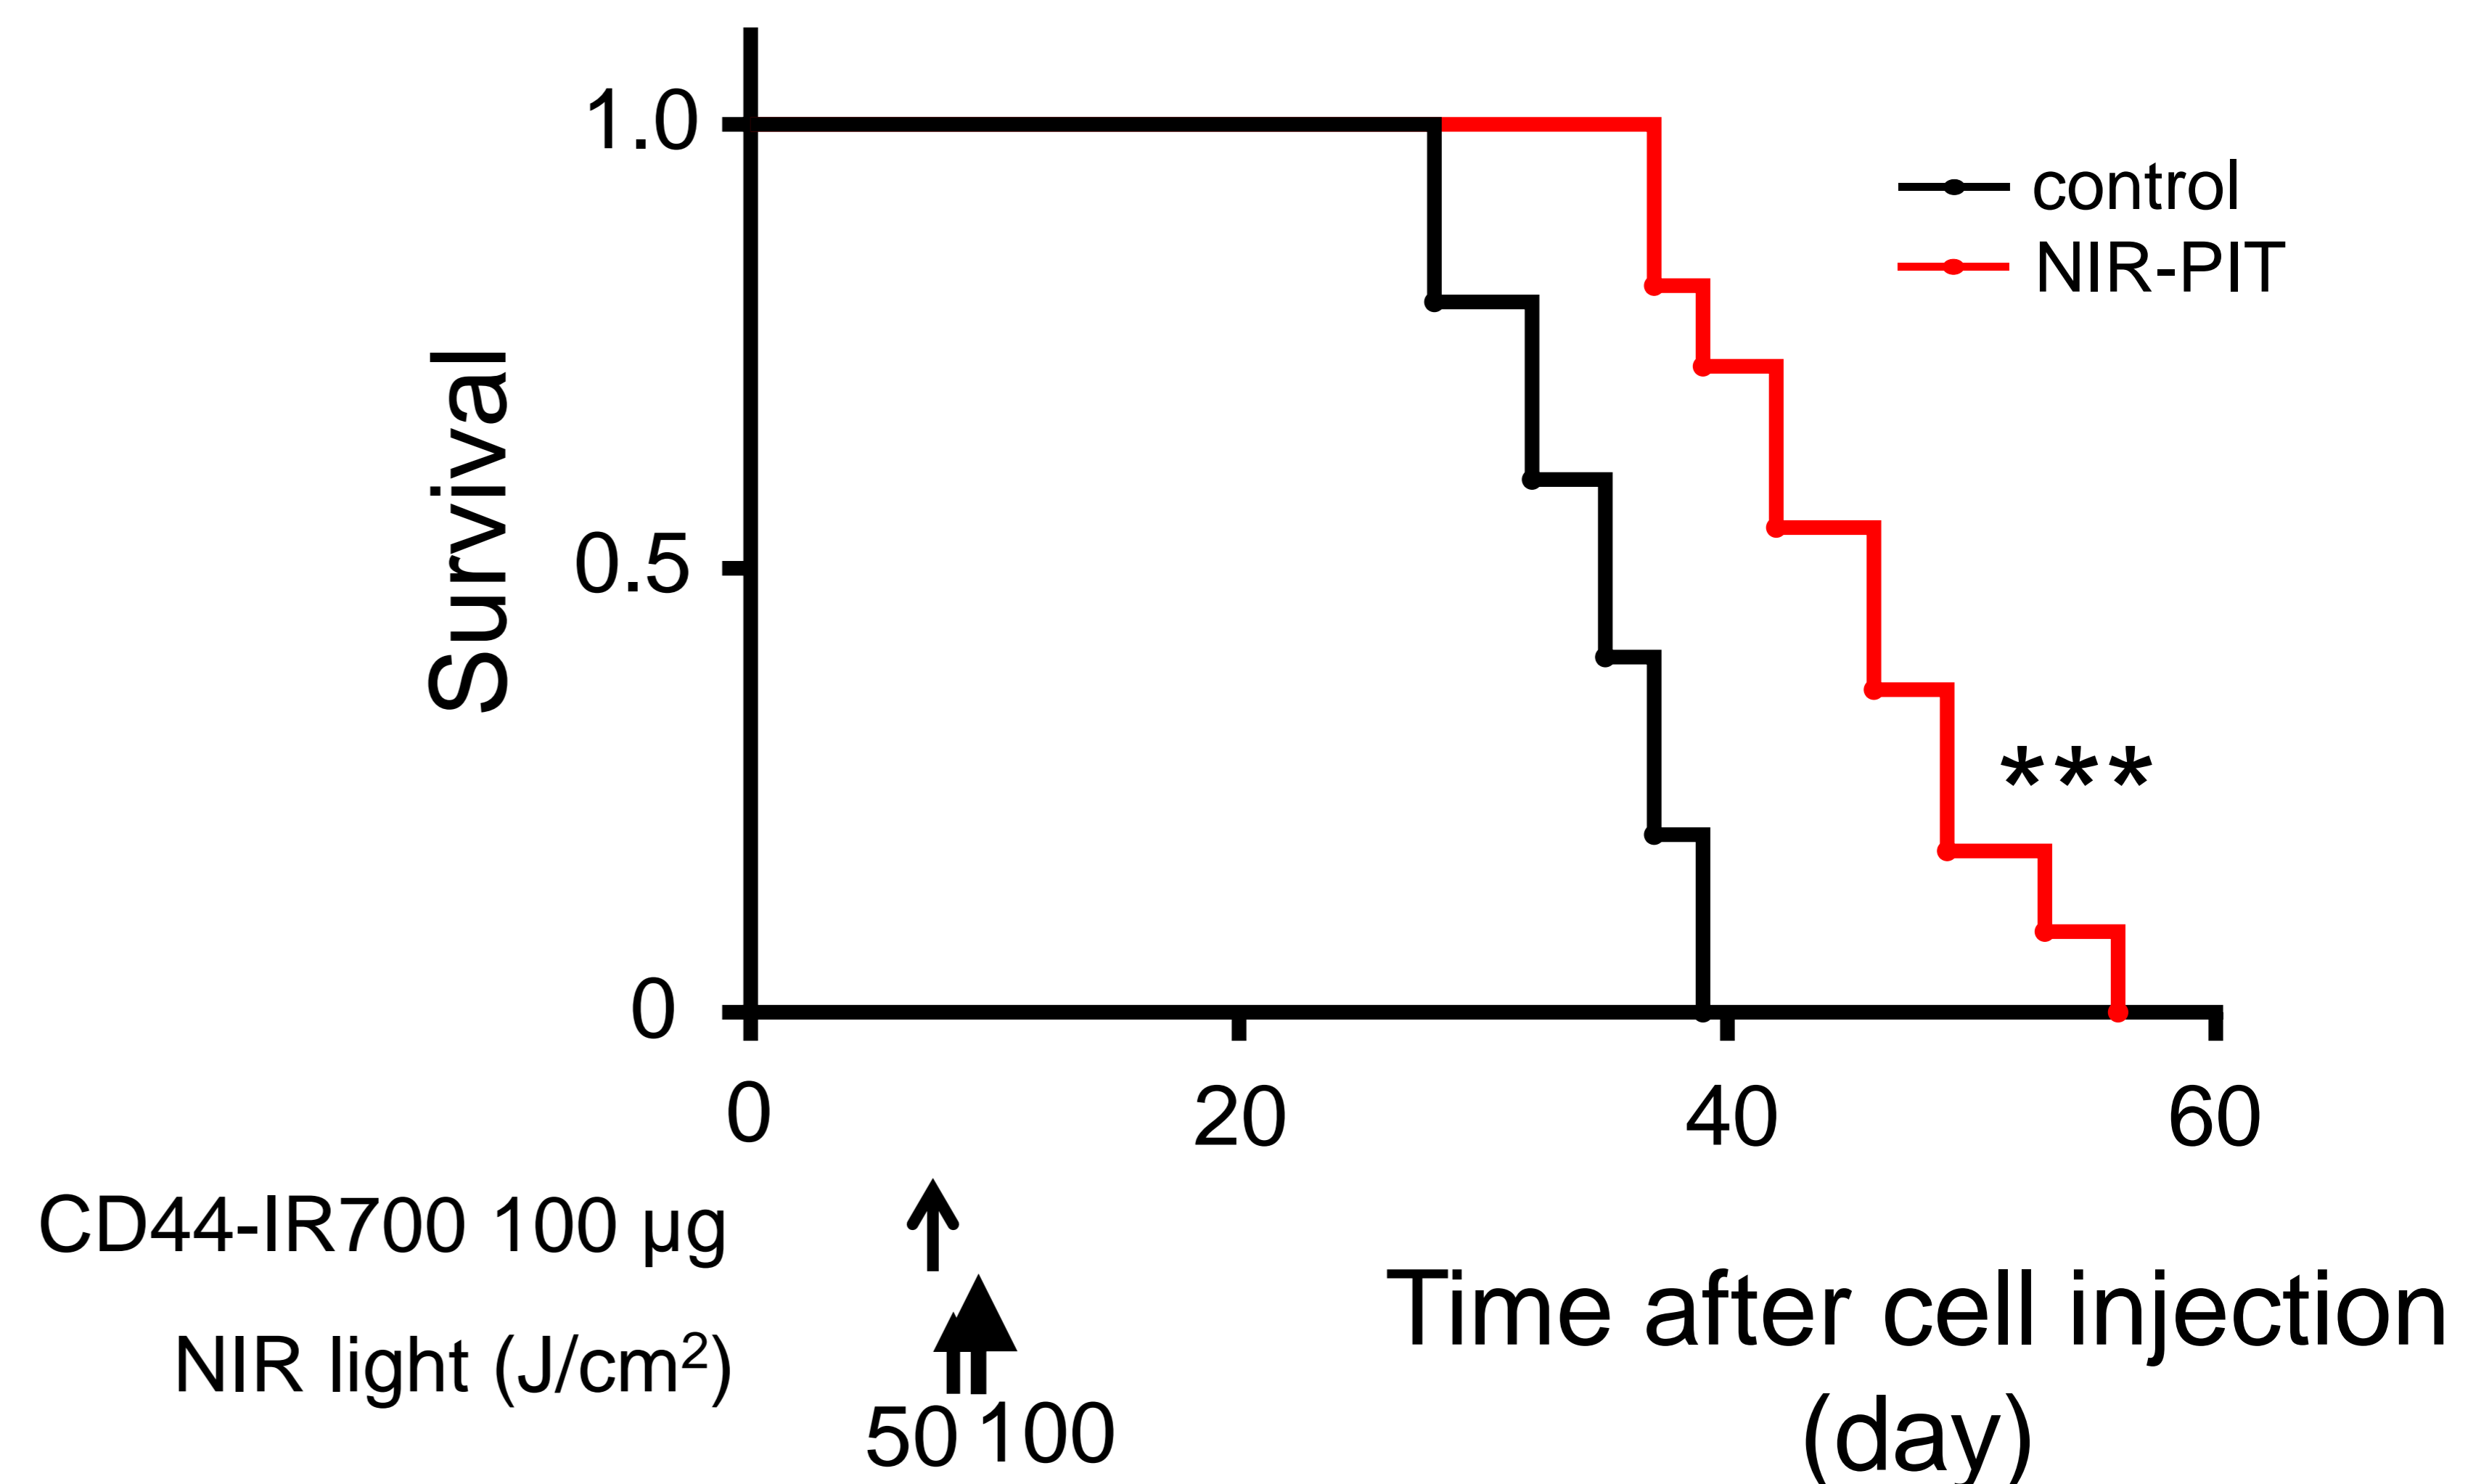



**A**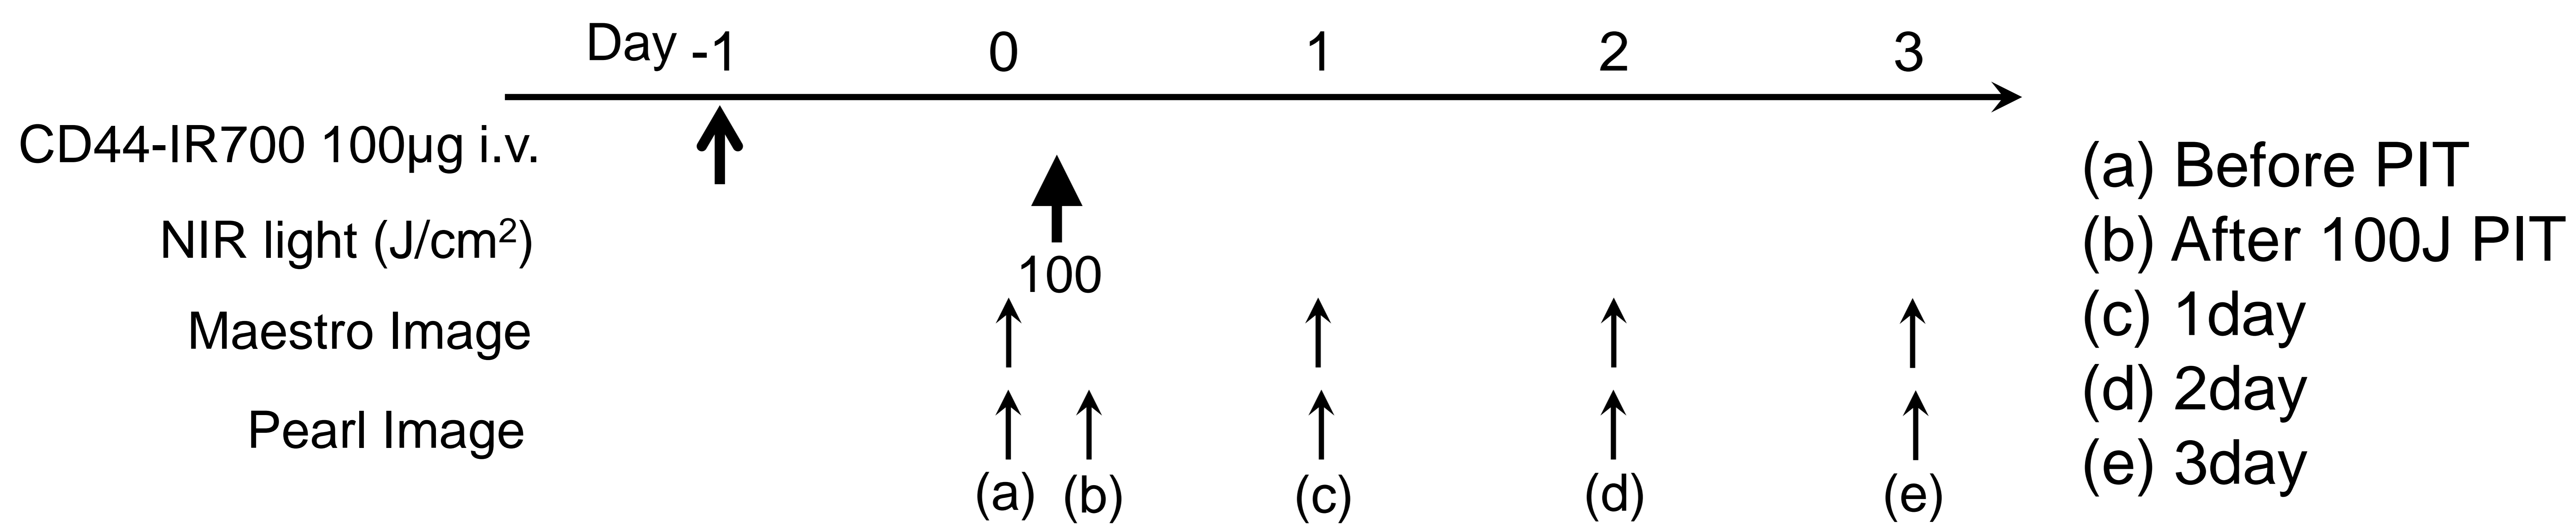**B**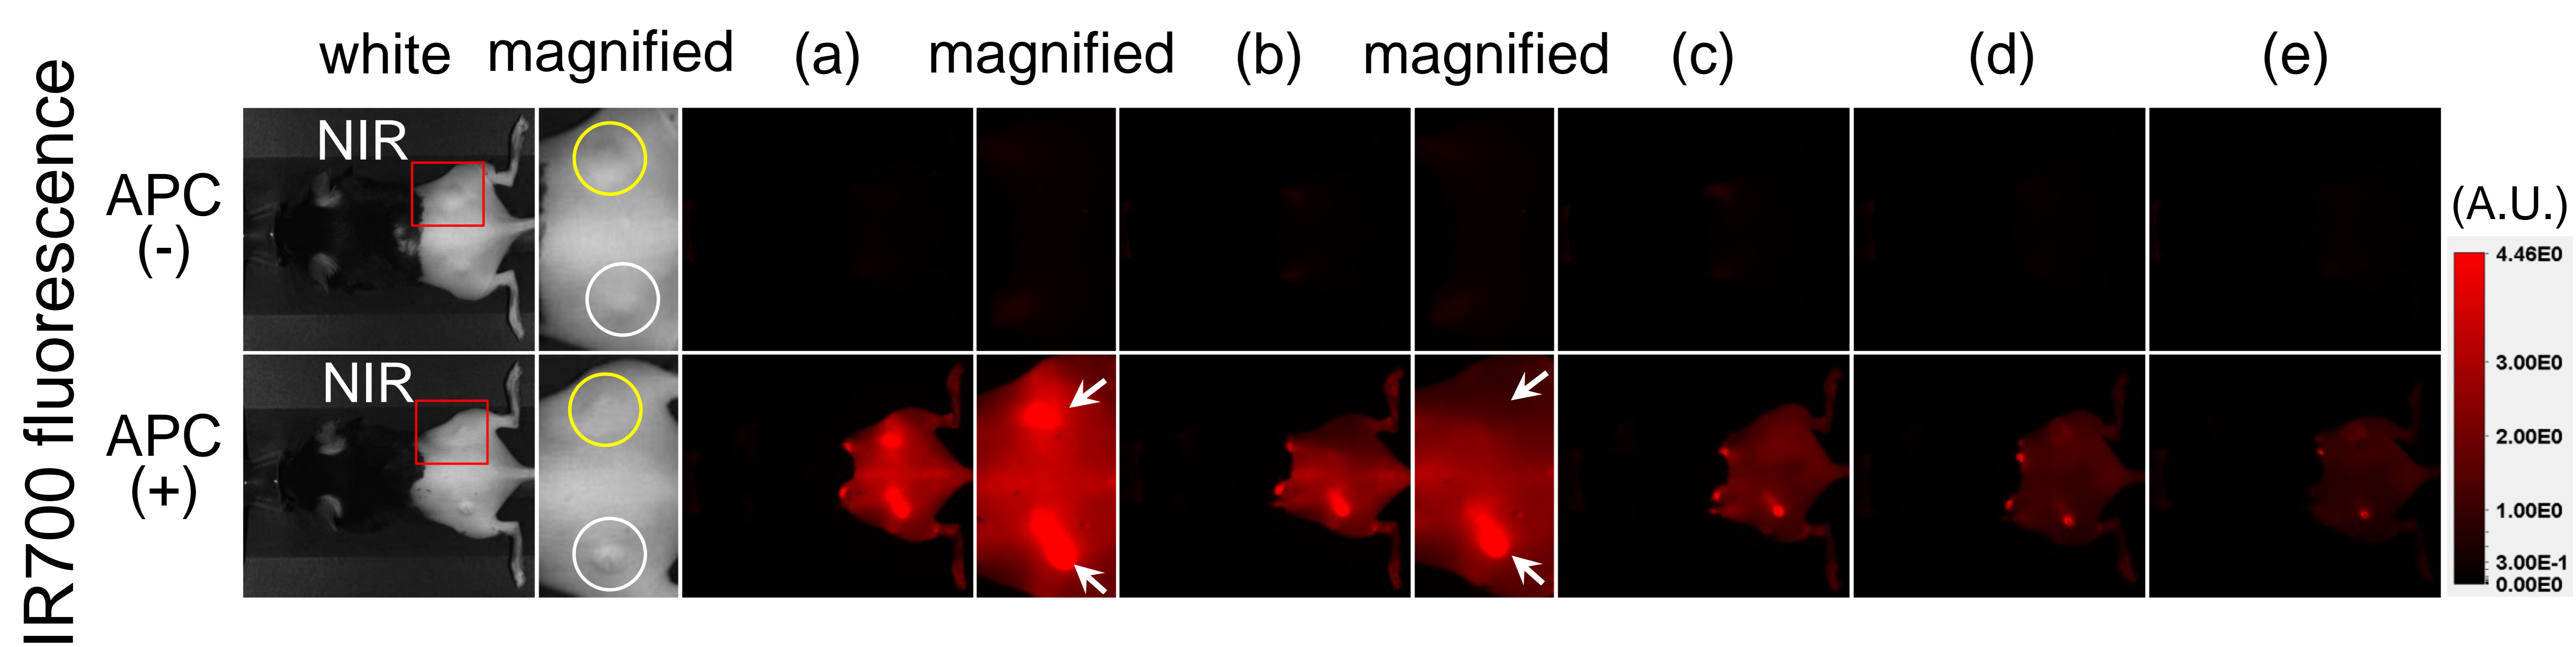**C**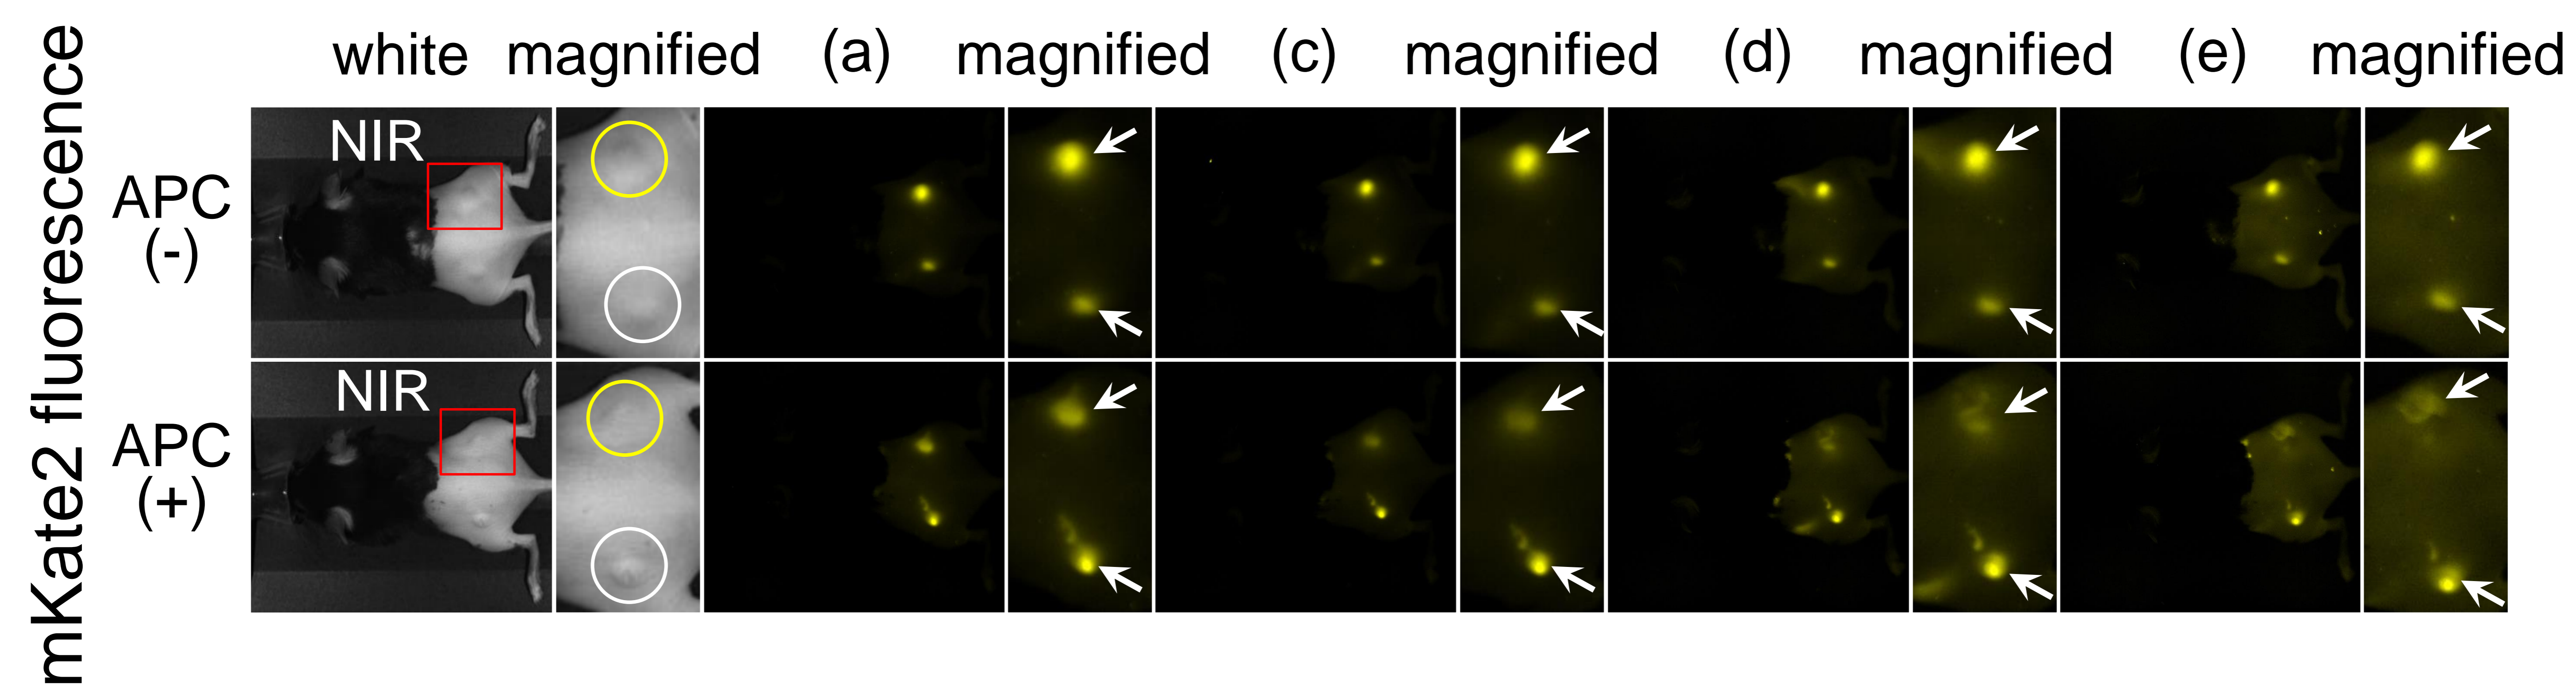**D**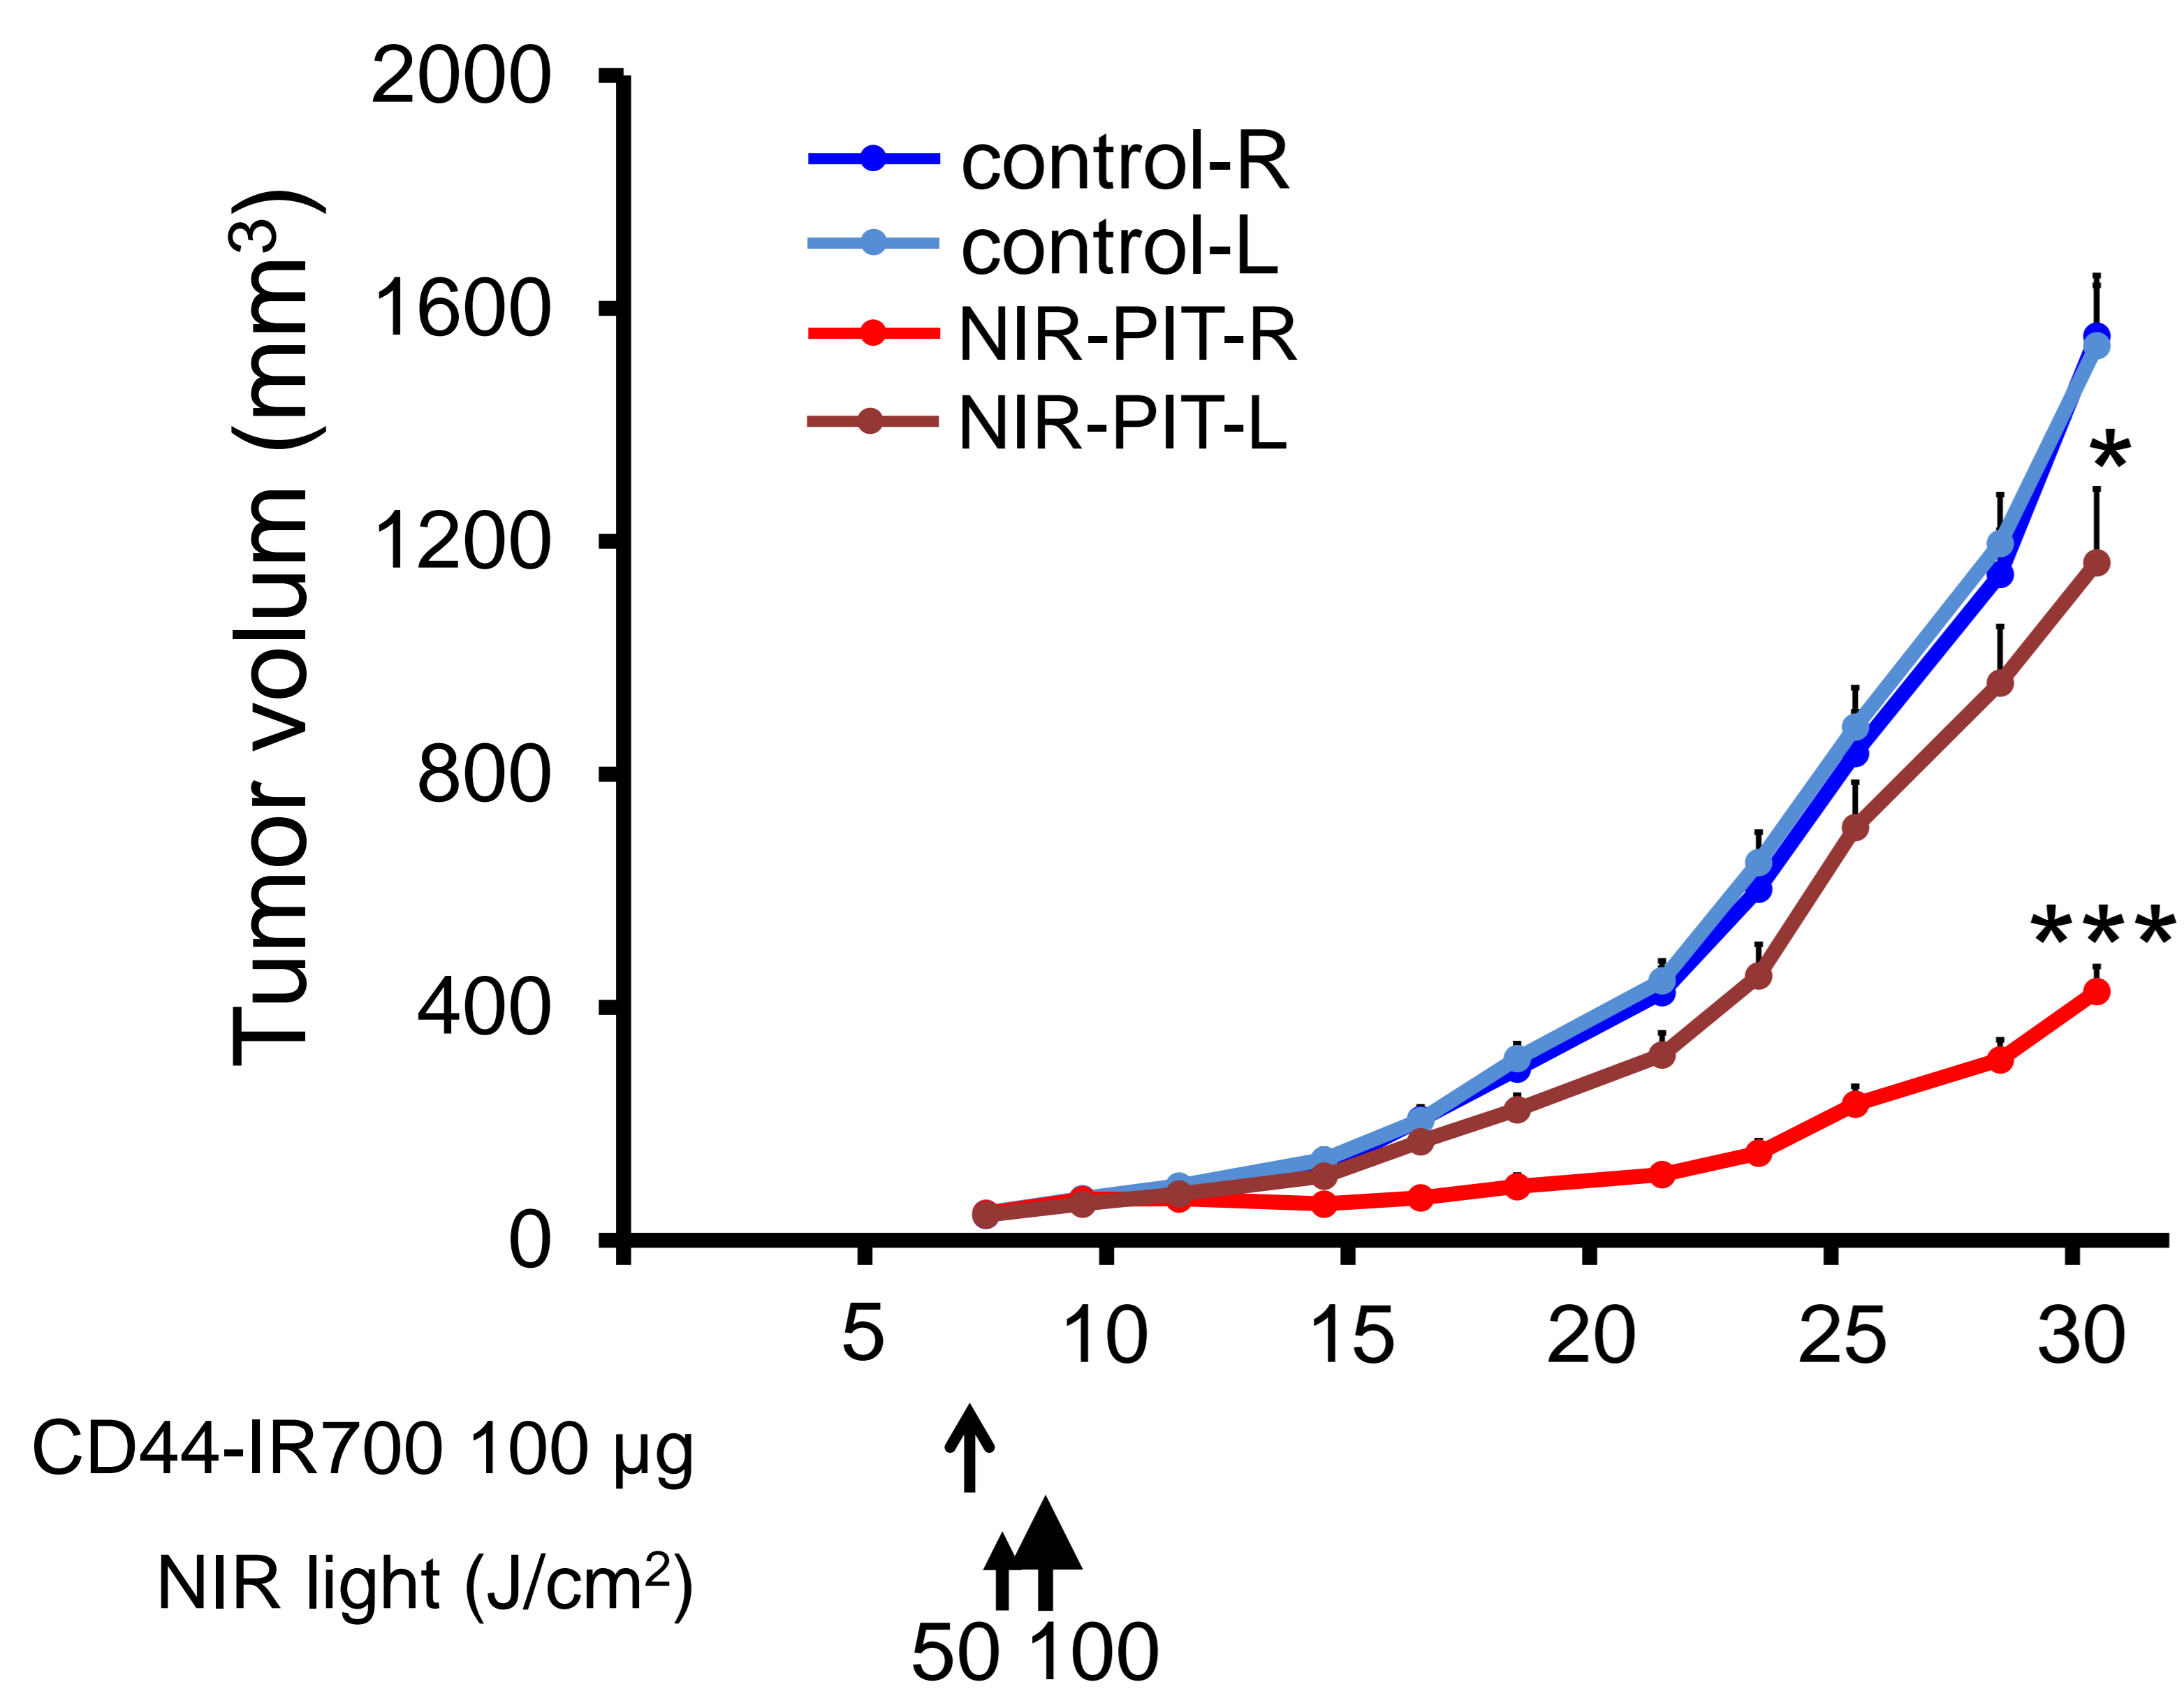**E**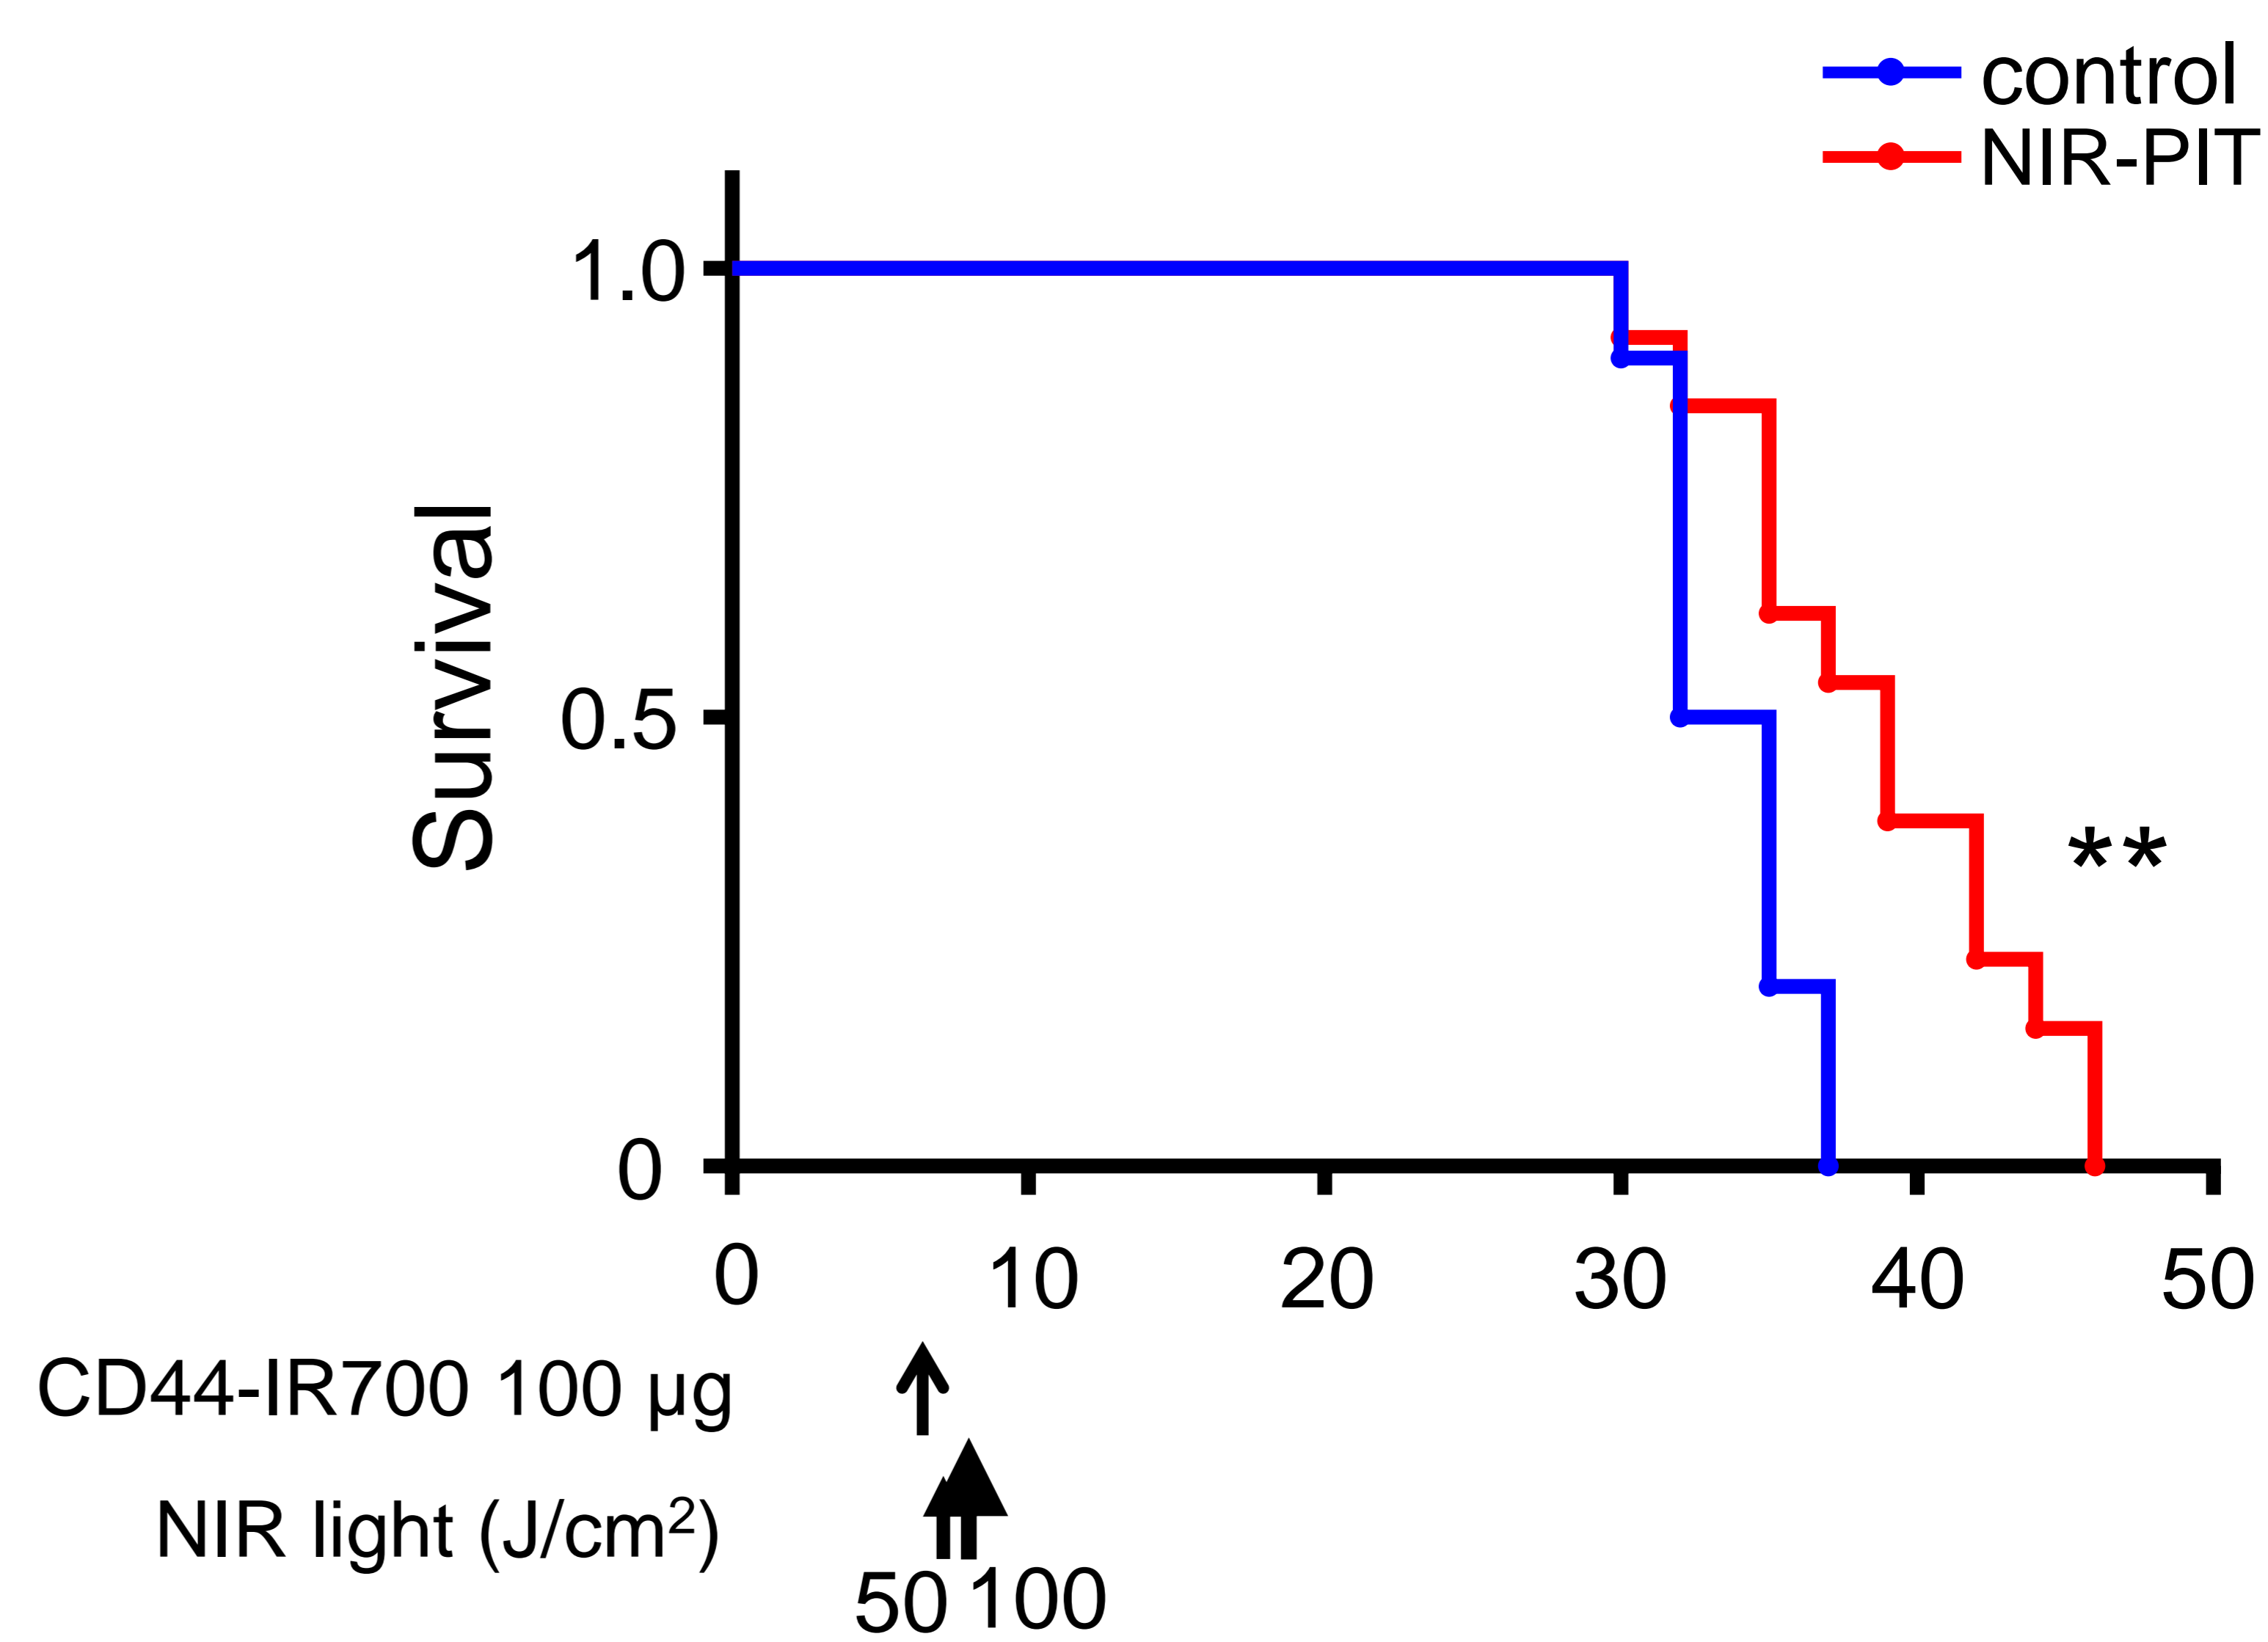

Supplement: NIHMS907403-supplement-Supplemental_Figures.pdf [file NIHMS907403-supplement-Supplemental_Figures.pdf]
